# Supplementary material
Source: publisher figshare collection journal article supplement (https://brill.figshare.com/articles/dataset/_/26779453)
Supplement: Supplementary file 1 [file 2]

**Supplementary Fig. S1.** ITS1 sequence database.

>*Heterodera trifolii*

TGCTGGATCATTACCCAAGTTATTCCTATTCACCACCTACCTGCTGTCCTGTTCGGCGAGCGTTGGCACCAC

CAAATGCCCCCGTCCGCTGACGGGCACAGGTCGTTCGAGATGACTTGTGGACGCTGCCCAACGTTACGGGGC

AGCTGCCTCACGAGCCATGCTTTTGGGGTGCTTCTGCTGGATCATTATCCCAAGTGATTCCTTTTCACCACC

TACCTGCTGTCCTGTTGGGCGAGCGTTGGCACCACCAAATGCCCCCGTCCGCTGACGGGCACAGGTCGTTCG

AGATGACTTGTGGACGCTGCCCAACGTTACGGGGCAGCTGCCTCACGAGCCATGCTTTTGGGGTGCTTCCAT

ACGTTGGAGCTGGTGTACCGCTCAGTGCTGCACATGTGAAAGCCTGTGGATGGCTGCTGTGTGGCAATGTGT

CGGTGGCGGGCCGCCTCGCTTGGTTGGTTCGCTGCGCCAACGGGGTATGCACGCTCGTGGGGCGACCTAACG

GCTGTGCTGGCGTCTGTGCGTCGTTGAGCGGTTGTTGTGGTAGGCACATAACACACTGACTGGGGATGGTGG

TTTCGTTCCCAGTCTTACGTGCCGTAACTAGCGGTGTGTTTGTGCTTGCTGCTACGTCCGTGGCCGTGATGA

GACGACGCGGTAGGGCCCGTGCTTGGCCTAGCACGTGGCTTAAGACTCAATGAGTGTCAGCTCGGGCACCGC

CAGCTTTTTCTTTTTTTTCATTATTTTTTTTACACTTCTGTTGAAGAATGAATTCTAGTCTTATCGGTGGAT

CACTCGGCTCGTGGATCGATGAAGAACGCAGCCAACTGCGATAATTAGTGCGAACTGCAGAAACCTTGAACA

CAAAACATTCGAATGCACATTGCGCCATTGGAGTTACATCCATTGGCACGCCTGGTTCAGGGTCGTTACCAT

AAAATGCACTGCTTGTGCGTTGCTTCGTGGGATCATGTACTTGTACGTGTTCTTACTTTACTTGCTCAGCTC

GGCTGTGGGGTTTTGGTGTGCTGGCGCGAACTTGTGGTTCTAATTCGCGTTTTACGGACCGTAACTCGGGCG

CACCAGTCCTTCGCATGCTGTGGCGGAGTGCCTGGCTTACTGGCATTCCTGCTTTGATTTTTCGACCTGAAC

TCAGACGTGAACACCCGCTGAACTTAAGCATAT

>*H. betae*

GTTTCCGTAGGTGAACCTGCTGCTGGATCATTACCCAAGTGATTCCTATTCACCACCTACCTGCTGTCCTGT

TGGGCGAGCGTTGGCACCACCAAATGCCCCCGTCCGCTGACGGGCACAGGTCGTTCGAGATGACTTGTGGAC

GCTGCCCAACGTTACGGGGCAGCTGCCTCACGAGCCATGCTTTTGGGGTGCTTCCATACGTTGGAGCTGGTG

TACCGCTCAGTGCTGCACATGTGAAAGCCTGTGGATGGCTGCTGTGTGGCAATGTGTCGGTGGCGGGCCGCC

TCGCTTGGTTGGTTCGCTGCGCCAACGGGGTATGCACGCTCGTGGGGCGACCTAACGGCTGTGCTGGCGTCT

GTGCGTCGTTGAGCGGTTGTTGTGGTAGGCACATAACACACTGACTGGGGATGGTGGTTTCGTTCCCAGTCT

TACGTGCCGTAACTAGCGGTGTGTTTGTGCTTGCTGCTACGTCCGTGGCCGTGATGAGACGACGCGGTAGGG

CCCGTGCTTGGCCTAGCACGTGGCTTAAGACTCAATGAGTGTCAGCTCGGGCACCGCCAGCTTTTTCTTTTT

TTTTCATTATTTTTTTTTACACTTCTGTTGAAGAATGAATTCTAGTCTTATCGGTGGATCACTCGGCTCGTG

GATCGATGAAGAACGCAGCCAACTGCGATAATTAGTGCGAACTGCAGAAACCTTGAACACAAAACATTCGAA

TGCACATTGCGCCATTGGAGTTACATCCATTGGCACGCCTGGTTCAGGGTCGTTACCATAAAATGCACTGCT

TGTGCGTTGCTTCGTGGGATCATGTACTTGTACGTGTTCTTACTTTACTTGCTCAGCTCGGCTGTGGGGTTT

TGGTGTGCTGGCGCGAACTTGTGGTTCTAATTCGCGTTTTACGGACCGTAACTCGGGCGCACCAGTCCTTCG

CATGCTGTGGCGGAGTGCCTGGCTTACTGGCATTCCTGCTTTGATTTTTCGACCTGAACTCAGACGTGAACA

CCCGCTGAACTTAAGCATAT

>*H. koreana*

GGTTTCCGTAGGTGAACCTGCTGCTGGATCATTACCCAAGTGATTCACATTCACCACCTACCTT

ACTGCTCTGTTCGCCAATGAGGTGGGCACTACCATATGCCTCCGTCCAAGCTGAACGGACGGACACGGGCCT

TTGGAATGGCCTGTGCACTGAAGGGTGGACGGGCAGGAGCCCTGCAGAGAACTGCTTTGGGGTGTATTCAGG

CGTTGGAGCATGGTATACTGGGCCGTTTGGCCTGGTGGCTTATCAGCAACTTGCTGTGTTGTTGGTTTGCCG

CTTCGACGACTGGATCACTTCTGCTGGGCCTGAACGGATGTGCTGGTGTCTGCTCGTCGTTGAACGGTTGTT

GCGCCTTGCGCCGACACACTGGCCGGGAAGTGTGAGCCTTGCTCCCGGTCTTACGAACCGTAACTAGCGGTG

TGTCTGTGCATGTGTGCTTTGTCCGTGGCCGCGATGAGACGACTTGGTAGGGTCTGTGCTCGGCTTAGCACA

TGGCTTCAGACTTAATGAGTGCCGGCGTGGCACCGCCAGCATTTCTCTTTTTTCAATTATTTTTTTGTTACG

CTTCTTCGGAAGAAACAAACAATTCTAGTCTTATCGGTGGATCACTCGGCTCGTGGATCGATGAAGAACGCA

GCCAACTGCGATAATTAGTGTGAACTGCAGAAACCTTGAACACTGAACTTTCGAATGCACATTGCGCCATTG

GAGTTACATCCATTGGCATGTCTGGTTCAGGGTCGTAACCATAAAACGCCATGCAATGCGCGTGTTTGAACC

GTGAGATCACGTGAACAGCGTGTTCTCCTTGGACTTGGTGATTAGTCCCGGCATGGGGTTTGGTGGTGTCAG

CGCGGAATTGTGTGCTTATTCGCGTTTTGCATACCGCAAACTTGGGCACTCCGTTCTCCATGTGCTGTGGCA

GGATGCCCTGGCAATTGGGCGTCCGTGCATTGACTTTTCGACCTGAACTCAGACATGATTACCCGCTGAACT

TAAGCATAT

>*H. pratensis*

CCAAGTGATTCCATTCACCATCTACCTGTGCTGTCCAGTTGAAACGTTGCTTGGCACCACCACATGCCCCCG

TCTGCTGACGGGCACGGACCGGTCGAGATGGTCTGTGGGCACGGGACAACGCTGAGTGGACGGCTACCCTGC

GAGCACTCTGTGCTTTGGGGTGTTCTCCGACGATGGTGCTTGGTATACTGACTCGTTGCTGAGCAAAGTGAA

AAGCCTGAGGTTTGGCTGCGAAGCAATCGAGTTGGTGGCGGACCGCCTTGCTGGTTGGTTTGCTGTACCGTC

GTTGGGCAGCACGCTCGTTGGGTAACCCAACGGCTGTGCTGGTGTCTGTGCGTCGTTGAGCGGTTGTTGTGC

CTGGCACATGTGACACACTGGCCTGGGAAAGTGGTTCTTTCCTGGCCTTACGAACCGTAACTAGCGGTGTGT

CCGTGCCTGTGTGCTACGTCCGTGGCCGTGATGAGACGACGTGGTAGGGCCCGTGCTATGCTTCTGCACGTG

GCTTAAGACTTAATGAGTGTCAGCTAGGCACCGCCAGTGTTTTTTTTCATTTATTTTTTTGACCACTTCTTT

GTTGAAGAAAGAAATTCTAGTCTTATCGGTGGATCACTCGGCTCGTGGATCGATGAAGAACGCAGCCAACTG

CGATAATTAGTGCGAACTGCAGAAACCTTGAACACAAAACTTTCGAATGCACATTGCGCCATTGGAGTTACA

TCCATTGGCACGCCTGGTTCAGGGTCGTTATCATAAAAGGCACTGCTGTGCCTGTTATGTTGGTGAGATCAT

GTCGGCTTGACGTGTTCTTGCGCTATTCTTAAAAATGCTCGGCCGTGGAGTGTGGTTGTGTTGGCGCGAAAC

TGTCAGGTTCTTTCGCGTTTTACGGTCCGTAACTAGGACGCAACTGCTCGCCATGTGTGCTGGGTGGAATGC

TTCGCTGGTAGGCATTCCGTGTTTGAATT

>*H. avenae*

CATTTCGAGAATTCGGGGACGGTTAGTGTGCCGGCTTCGGCCGACGCACGGACTGGAACCGATTTAATCGCA

GTGGCTTGAACCGGGCAAAAGTCGTAACAAGGTTTCCGTAGGTGAACCTGCTGCTGGATCATTACCCAAGTG

ATTCCATTCACCATCTACCTGTGCTGTCCAGTTGAAACGTTGCTTGGCACCACCACATGCCCCCGTCTGCTG

ACGGGCACACGGACCGGTCGAGATGGTCTGTGGGCACGGGACAACGCTGAGTGGACGGCTACCCTGCGAGCA

CTCTGTGCTTTGGGGTGTTCTCCGACGATGGTGCTTGGTATATACTGACTCGTTGCTGAGCAAAGTGAAAAG

CCTGAGGTTTGGCTGCGAAGCAATCGAGTTGGTGGCGGACCGCCTTGCTGGTTGGTTTGCTGTACCGTCGTT

GGGCGAGCACGCTCGTTGGGTAACCCAACGGCTGTGCTGGTGTCTGTGCGTCGTTGAGCGGTTGTTGTGCCT

GGCACATGTGACACACTGGCCTGGGAAAGTGGTTCTTTCCTGGCCTTACGAACCGTAACTAGCGGTGTGTCC

GTGCCTGTGTGCTACGTCCGTGGCCGTGATGAGACGACGTGGTAGGGCCCGTGCTATGCTTCTGCACGTGGC

TTAAGACTTAATGAGTGTCAGCTAGGCACCGCCAGTGTTTTTTTTTCATTTATTTTTTTGACCACTTCTTTG

TTGAAGAAAGAAATTCTAGTCTTATCGGTGGATCACTCGGCTCGTGGATCGATGAAGAACGCAGCCAACTGC

GATAATTAGTGCGAACTGCAGAAACCTTGAACACAAAACTTTCGAATGCACATTGCGCCATTGGAGTTACAT

CCATTGGCACGCCTGGTTCAGGGTCGTTATCATAAAAGGCACTGCTGTGCCTGTTATGTTGGTGAGATCATG

TCGGCTTGACGTGTTCTTGCGCTATTCTTAAAAATGCTCGGCCGTGGAGTGTGGTTGTGTTGGCGCGAAACT

GTCAGGTTCTTTCGCGTTTTACGGTCCGTAACTAGGACGCAACTGCTCGCCATGTGTGCTGGGTGGAATGCT

TCGCTGGTAGGCATTCCCGTGTTTGAATTTTCGACCTGAACTCAGACGTGAGTACCCGCTGAACTTAAGCAT

ATAAG

>*H. auklandica*

CCAAGTGATTCCATTCACCATCTACCTGTGCTGTCCAGTTGAAACGTTGCTTGGCACCACCACATGCCCCCG

TCTGCTGACGGGCACGGACCGGTCGATATGGTCTGTGGGCACGGGACAACACTGAGTGGACGGCTACCCTGC

GAGCACTCTGTGCTTTGGGGTGTTCTCTGACGATGGTGCTTGGTATACTGACTCGTTGCTGAGCAAAGTGAA

AAGCCTGAGGTTTGGCTGCGAAGCAACCGAGTTGGTGGCGGACCGCCTTGCTGGTTGGTTTGCTGTACCGTC

GTTGGACGAGCACGCTCGTTGGGTAACCCAACGGCTGTGCTGGTGTCTGTGCGTCGTTGAGCGGTTGTTGTG

CCTGGCACATGTGACACACTGGCCTGGGAAAGTGGTTCTTTCCTGGCCTTACGAACCGTAACTAGTGGTGTG

TCTGTGCCTGTGTGCTACGTCCGTGGCCGTGATGAGACGACGTGGTAGGGCCCGTGCTATGCTTTTGCACGT

GGCTTAAGACTCAATGAGTGTCAGCTAGGCACCGCCAGTGTTTTTTTCATTTATTTTTTTGACCACTTCTTT

GTTGAAGAAAGAAATTCTAGTCTTATCGGTGGATCACTCGGCTCGTGGATCGATGAAGAACGCAGCCAACTG

CGATAATTAGTGCGAACTGCAGAAACCTTGAACACAAAACTTTCGAATGCACATTGCGCCATTGGAGTTACA

TCCATTGGCACGCCTGGTTCAGGGTCGTTATCATAAAAGGCACTGCTGTGCCTGTTATGTTGGTGAGATCAT

GTTGGCATGACGTGTTCTTGCGCTATTCTTGAAAATGCTCGGCCGTGGAGTGTGGTTGTGTTGGTGCGAAAC

TGTCAGGTTCTTTCGCGTTTTACGGTCCGTAACTAGGACGCAACTGCTCGCCATGTGTGCTGGGTGGAATGC

TTCGCTGGTAGGCATTCCGTGTTTGAATT

>*H. mani*

CCAAGTGATTCCATTCACCATCTACCTGTGCTGTCCAGTTGAAACGTTGCTTGGCACCACCACATGCCCCCG

TCTGCTGACGGGCACGGACCGGTCGAGATGGTCTGTGGGCACGGGACAACACTGAGTGGACGGCTACCCTGC

GAGCACTCTGTGCTTTGTTGGGGTGTTCTCCGACGATGGTGCTTGGTATATACTGACTCGTTGCTGAGCAAA

GTGAAAAGCCTGAGGTTTGGCTGCGAAGCAATCGAGTTGGTGGCGGACCGCCTTGCTGGTTGGTTTGCTGTA

CCGTCGTTGGACGAGCACGCTCGTTGGGTAACCCAACGGCTGTGCTGGTGTCTGTGCGTCGTTGAGCGGTTG

TTGTGCCTGGCACATGTGACACACTGGCCTGGGAAAGTGGTTCTTTCCTGGCCTTACGAACCGTAACTAGCG

GTGTGTCCGTGCCTGTGTGCTACGTCCGTGGCCGTGATGAGACGACGTGGTAGGGCCCGTGCTATGCTTCTG

CACGTGGCTTAAGACTCAATGAGTGTCAGCTAGGCACCGCCAGTGTTTTTTTTCATTTATTTTTTTGACCAC

TTCTTTGTTGAAGAAAGAAATTCTAGTCTTATCGGTGGATCACTCGGCTCGTGGATCGATGAAGAACGCAGC

CAACTGCGATAATTAGTGCGAACTGCAGAAACCTTGAACACAAAACTTTCGAATGCACATTGCGCCATTGGA

GTTACATCCATTGGCACGCCTGGTTCAGGGTCGTTATCATAAAAGGCACTGCTGTGCCTGTTATGTTGGTGA

GATCATGTCGGCATGACGTGTTCTTGCGTTATTCTTGAAAATGCTCGGCCGTGGAGTGTGGTTGTGTTGGCG

CGAAACTGTCAGGTTCTTTCGCGTTTTACGGTCCGTAACTAGGACGCAACTGCTCGCCATGTGTGCTGGGTG

GAATGCTTCGCTGGTAGGCATTCCGTGTTTGAATTTTCGACCTGAAC

>*H. arenaria*

CCAAGTGATTCCATTCACCATCTACCTGTGCTGTCCAGTTGAAACGTTGCTTGGCACCACCACATGCCCC

CGTCTGCTGACGGGCACGGACCGGTCGAGATGGTCTGTGGGCACGGGACAACACTGAGTGGACGGCTACC

CTGCGAGCACTCTGTGCTTTGGGGTGTTCTCCGACGATGGTGCTTGGTATACTGACTCGTTGCTGAGCAA

AGTGAAAAGCCTGAGGTTTGGCTGCGAAGCAATCGAGTTGGTGGCGGACCGCCTTGCTGGTTGGTTTGCT

GTATCGTCGTTGGACGAGCACGCTCGTTGGGTAACCCAACGGCTGTGCTGGTGTCTGTGCGTCGTTGAGC

GGTTGTTGTGCCTGGCACATGTGACACACTGGCCTGGGAAAGTGGTTCTTTCCTGGCCTTACGAACCGTA

ACTAGCGGTGTGTCTGTGCCTGTGTGCTACGTCCGTGGCCGTGATGAGACGACGTGGTAGGGCCCGTGCT

ATGCTTCTGCACGTGGCTTAAGACTCAATGAGTGTCCGCTAGGCACCGCCAGTGTTTTTTTTCATTTATT

TTTTTGACCACTTCTTTGTTGAAGAAAGAAATTCTAGTCTTATCGGTGGATCACTCGGCTCGTGGATCGA

TGAAGAACGCAGCCAACTGCGATAATTAGTGCGAACTGCAGAAACCTTGAACACAAAACTTTCGAATGCA

CATTGCGCCATTGGAGTTACATCCATTGGCACGCCTGGTTCAGGGTCGTTATCATAAAAGGCACTGCTGT

GCCTGTTATGTTGGTGAGATCATGTCGGCATGACGTGTTCTTGCGCTATTCTTGAAAATGCTCGGCCGTG

GAGTGTGGTTGTGTTGGCGCGAAACTGTCAGGTTCTTTCGCGTTTTACGGTCCGTAACTAGGACGCAACT

GCTCGCCATGTGTGCTGGGTGGAATGCTTCGCTGGTAGGCATTCCGTGTTTGAATT

>*H. australis*

CCAAGTGATTCCATTCACCATCTACCTGTGCTGTCCAGTTGAAACGTTGCTTGGCACCACCACATGCCCCCG

TCTGCTGACGGGCACGGACCGGTCGAGATGGTCTGTGGGCACGGGACAACGCTGAGTGGACGGCTACCCTGC

GAGCACTCTGTGCTTTGGGGTGTTCTCCGACGATGGTGCTTGGTATACTGACTCGTTGCTGAGCAAAGTGAA

AAGCCTGAGGTTTGGCTGCGAAGCAATCGAGTTGGTGGCGGACCGCCTTGCTGGTTGGTTTGCTGTACCGTC

GTTGGGCGAGCACGCTCGTTGGGTAACCCAACGGCTGTGCTGGTGTCTGTGCGTCGTTGAGCGGTTGTTGTG

CCTGGCACATGTGACACACTGGCCTGGGAAAGTGGTTCTTTCCTGGCCTTACGAACCGTAACTAGCGGTGTG

TCCGTGCCTGTGTGCTACGTCCGTGGCCGTGATGAGACGACGTGGTAGGGCCCGTGCTACGCTTCTGCACGT

GGCTTAAGACTTAATGAGTGTCAGCTAGGCACCGCCAGTGTTTTTTTTCATTTATTTTTTTGACCACTTCTT

TGTTGAAGAAAGAAATTCTAGTCTTATCGGTGGATCACTCGGCTCGTGGATCGATGAAGAACGCAGCCAACT

GCGATAATTAGTGCGAACTGCAGAAACCTTGAACACAAAACTTTCGAATGCACATTGCGCCATTGGAGTTAC

ATCCATTGGCACGCCTGGTTCAGGGTCGTTATCATAAAAGGCACTGCTGTGCCTGTTATGTTGGTGAGATCA

TGTCGGCTTGACGTGTTCTTGCGCTATTCTTGAAAATGCTCGGCCGTGGAGTGTGGTTGTGTTGGCGCGAAA

CTGTCAGGTTCTTTCGCGTTTTACGGTCCGTAACTAGGACGCAACTGCTCGCCATGTGTGCTGGGTGGAATG

CTTCGCTGGTAGGCATTCCGTGTTTGAATT

>*H. filipjevi*

GTTTCCGTAGGTGAACCTGCTGCTGGATCATTACCCAAGTGATTCCATTCACCATCTACCTGTGCTGTCCAG

TTGGAACGTTGCTTGGCACCACCACATGCCCCCGTCTGCTGTTGAGACGGGCACGGACCGGTCGAGATGGTC

TGTGGGCACGGGACAACACTGAGCGGACGGCTACCCTGCGAGCACTCTGTGCTTTGGGGTGTTCTCCGTCGA

TGGTGCTTGGTATACTGACTCGTTGCTGAGCAAAGTGATAATAAAAGCCTGAGGTTTGGCTGCGAGGCAATT

GAGTTGGTGGCGGACCGCCTCGCTGGTGGGTTTGCTGTACCGTCGAAGGGAGCACGCTCGTTGGGTAACCCA

ACGGCTGTGCTGGTGTCTGTGCGTCGTTGAGCGGTTGTTGTGCCTGGCACATGTGACACACTGGCCTGGGAA

GGTGGTTCTTTCCTGGCCTTACGAACCGTAACTAGCGGTGTGTCTGTGCTTGTGTGCTACGTCCGTGGCCGT

GATGAGACGACGTGGTAGGGTCCGTGCTCTGCTTATAGCACGTGGCTTAAGACTTAATGAGTGTCAGCTAGG

CACCGCCAGTGTTTTTTTTCATTTATTTTTTTGACCACTTCTTTGTTGAAGGAAGAAATTCTAGTCTTATCG

GTGGATCACTCGGCTCGTGGATCGATGAAGAACGCAGCCAACTGCGATAATTAGTGCGAACTGCAGAAACCT

TGAACACAAAACTTTCGAATGCACATTGCGCCATTGGAGTTACATCCATTGGCACGCCTGGTTCAGGGTCGT

TATCATAAAAGGCACTGCTGTGCCTGTTATGTTGGTGAGATCATGTCTGCAGGACGTGTTCTTGCGCTATTC

TTGAAAATGCTCGGCCGTGGAGTGTGGTTGTGTTGGCGCGAAACTGTCAGGTTCTTTCGCGTTTTACGGTCC

GTAACTAGGGCGCAACTGCTCTCCATGTGTGCTGGGTGGAATGCTTCGCTGGTAGGCATTCCGTGTTTGAAT

TTTCGACCTGAACTCAGACGTGAGTACCCGCTGAACTTAAGCATAT

>*H. ustinovi*

CCAAGTGATTCCATTCACCATCTACCTGTGCTGTCCAGTTGGAACGTTGCTTGGCACCACCACATGCCCCCG

TCTGCTGTTGAGACGGGCACGGATCGGTCGAGATGGTCTGTGGGCACGGGACAACACTGAGCGGACGGCTAC

CCTGCGAGCACTCTGTGCTTTGGGGTGTTCTCCGACGATGGTGCTTGGTATACTGACTCGTTGCTGAGCAAA

TTTGATAAGCCTGAGGTTTGGCTGCGAGGCAATTGAGTTGGTGGCGGACCGCCTTGCTGGTTGGTTTGCTGT

ACCGTCGTCGGGAGCGCGCTCGTTGGGTAACCCAACGGCTGTGCTGGTGTCTGTGCGTCGTTGAGCGGTTGT

TGTGCCTAGCACATGTGACACACTGGCCTGGGAAGGTGGTTCCTTCCTGGCCTTACGAACCGTAACTAGCGG

TGTGTCCGTGCTTGTGTGCTACGTCCGTGGCCGTGATGAGACGACGTGGTAGGGCCCGTGCTTTGCTTATAG

CACGTGGCTTAAGACTTAATGAGTGTCAGCTAGGCACCGCCAGTGTTTTTTTTCATTTATTTTTTTTGACCA

CTTCTTTGCTGAAGAAAGAAATTCTAGTCTTATCGGTGGATCACTCGGCTCGTGGATCGATGAAGAACGCAG

CCAACTGCGATAATTAGTGCGAACTGCAGAAACCTTGAACACAAAACTTTCGAATGCACATTGCGCCATTGG

AGTTACATCCATTGGCACGCCTGGTTCAGGGTCGTTATCATAAAAGGCACTGCTGTGTCTGTTATGTTGGTG

AGATCATGTCTGCACATGACGTGTTCTTGCGCTATGCTTGAAATGCTCGGCCGTGGAGTGTGGTTGTGTTGG

CGCGAAATTGTCAGGTTTTTTCGCGTTTTACGGTCCGTAACTAGGACGCAACTGCTCTCCATGTGTGCTGGG

TGGAATGCTTCGCTGGTAGGCATTCCGTGTTTGAATT

>*H. hordecalis*

CCAAGTGATTCCATTCACCATCTACCTGCTGTCCCGTT

GAAACCCGGTTGCTTTGGGCACCCACCACATGGCCCCCGTCTGGCTGTTGAGACGGGCACGGACCGATGGAG

ATGGTCCGTGGGCACGGGACAACACTGAGCGGACAGCTACCCCGCGAGCATTGCTTTGGGGTGTTCTCCAAC

GGTGGTGTTTGGTATACCGACTCGTTGCTGAGCAAAGTGATAGCCACTGGTGGCTGCGAGGCATCAGAGTTG

GTGGCGGACCGCCTCGCTGGTTGGTTTGCTGCACCATCGGAGGGGGCACGCTCGTTGGGTAACCCAACGGCT

GTGCTGGTGTCTGTGCGTCGTTGAGCGGTTGTTGTGCCTAGCACAAATGACACACTGGCCTGGAACAGTGGT

TTGTTCCTGGCCTTACGAACCGTAACTAGCGGTGTGTCTGTGCTTGTGTGCTACGTCCGTGGCCGTGATGAG

ACGACGTGGTAGGGCCAGTGCTTTGCTTATAGCACTGGCTTAAGACTTGATGAGTGTCGGCTAGGCACCGCC

AGTGTTTTTTTTCCATTTATTTATTTTTTTTTACACTTCTTTGCTGAAGAAAGAAATTCTAGTCTTATCGGT

GGATCACTCGGCTCGTGGATCGATGAAGAACGCAGCCAACTGCGATAATTAGTGCGAACTGCAGAAACCTTG

AACACAAAACTTTCGAATGCACATTGCGCCATTGGAGTTACATCCATTGGCACGCCTGGTTCAGGGTCGTTA

TCATAAAAGGCACTGCTTTGCCTGTTATGTTGGTGGGATCATGTCTTCTTGACGTGTTCCTGCGCTATGTGT

TCAATGCCCGGCTGTGGGATGTGGGTTGTGTTGGCGCGAAACTGTCAGGTTATTTTCGCGTTTTACGGTCCG

TAACTCGGACACAACTAGCGTTCCATGTATGCTGGGCGGAGTGCTTCGCTGGTAGGCATTCCATGTTTGAAT

T

>*H. latipons*

GTTTCCGTAGGTGAACCTGCTGCTGGATCATTACCCAAGTGATTCCATTCACCATCTCAGCTCGTTTCCGTA

GGTGAACCTGCTGTCCAGTTGGACTTGTGTCGGCATCACCATATGCCCCTGTCTGCTGTTGAGACGGGCACG

GACCGGTCGAGATGGTCTGTGGACACGGGACAACACTGAACGGACAGCTTACCCTGCGAGCAGAGCTTTGGG

GTGTTTTCAATGTTGGAGCTGGCATACTGACTCGTTGCTGAGCAAGTGAAAGCCTGAGGTTGGCTGCTGTGA

GGCAAATGAGTTGGTGGCGGACTGCCTCGCTGGTTGGTTTGCTGCACCAACGGAGGGAGCACGCTCGTTGGG

TGACCAAACGGCTGTGCTGGCGTCTGTGCGTCGTTGAGCGGTTGTTGTGCCAAGCATATGACACACTGGCCT

GGAATATTGGTTGTGTTCCTGGTCTTACGTGCCGTAATAAGCGGTGTGTCGGTGCTTGCGTGCTACGTCCGT

GGCCGTGATGAGACGACGTGGTAGGGCCCGTGCTTTGCTGATAGCACGTGGCTTAAGACTTAATGAGTGTCA

GCTAGGCACCGCCAGTGTTCTTTTTCATTTATTTTTTTTTAACACTTCATTGCTGAAGAAAGAAATTCTAGT

CTTATCGGTGGATCACTCGGCTCGTGGATCGATGAAGAACGCAGCCAACTGCGATAATTAGTGCGAACTGCA

GAAACCTTGAACACAAAACTTTCGAATGCACATTGCGCCATTGGAGTTACATCCATTGGCACGCCTGGTTCA

GGGTCGTTATCATAAAATGCACTGCTGTGCGTGTTATGTTGGTGAGATCATGTCTGCTTGACGTGTTCTTGC

GCTATTTCATTGAATGCCCGGCTGTGGATTGTGGTTGCGCTAGCGCGAAATTGTCAAGTTTTTTTTCGCGTT

TACGGACCGTAACTTGGGCGCAACTGTTCTCCATGTATGCTTGGGGCGGAATGCTTCGCTGGTAGGCATTCC

TCTTTTGAATTTTGACCCAAAATTGTAAACTTTTCGTTTTACGACCTGAACTCAGACGTGAGTACCCGCTGA

ACTTAAGCATATAAAAAAAAAAA

>*H. goldeni*

CCAAGTGATTCCATTCACCGTCTACCTGTGCTGTCCGCACGCTGTTGTTGGACCGTTGTGTTGGCCCCACCA

TATGCCCCTGCTCGCTTCGGCTGGGCAGGCACAGACCCAGTGTGTTGTTTTGGTCTGTGGCACACGGGAAGG

CACCGCTTGGACAGCCTACCCTGCGAGCATAATCGCTTTGGGGTGTTTGCTGCCGTTGGAGCCGGTATACTG

GCTCTTTGCTCTCCTTCCTCACGAGGGAAGGCCCGAGGATGGGTCCGTGAGGTTGGACAACTGAGCTGGGGG

TGGATCGCCTTGCCGGTGGGTTCGCTGCTCCTTCGTCAGTGGGCACGCTCGTGGGGTAACCAAACGGCTGTG

CTGGCGTCTGCGCGTCGTTGAGCAGTTGTTGTGCCTTGCACAGACACACTGAGCTGTAACGCTGGTTGGTCG

TGTTCAGCTCTTACGTGCCGTAACTAGCGGTGTGTCTGTGCTTGTGTGCTACGTCCGTGGCTGCGATGAGAC

GACGTGGTAGGGCCCGTGCTTGGCTAATGATAGCACGTGGCTTAAGACTCAATGAGTGTCGGCTAGGCACCG

CCAGCTTTTTTTCCATTTATTCATTTTTTTTATGCCACTTTGCGTGGTAGAACAACAAATTCTAGTCTTATC

GGTGGATCACTCGGCTCGTGGATCGATGAAGAACGCAGCCAACTGCGATAATTAGTGCGAACTGCAGAAACC

TTGAGCACAAAACTTTCGAATGCACATTGCGCCATTGGAGTTACATCCATTGGCACGCCTGGTTCAGGGTCG

TTATCAAAAAGCGCACTGCTGTGTGCGTGTTGTGTTCGTGGGATCGCGTCTGCGAGAGACGTGTTCTTGCGC

TGGTGTTGATTGCTCGGCTGTGGACGGTGGTTATGCTGGCGCGAAATCGTCAGTTTTTTTCGCGTTTTACGT

ACCGTAACTTGGGCGTAGCTGCTGTCCATGTATGTGCTTGGGCTGAATGCAGAGAGGCATTCGTGTTTTGAA

TT

>*H. sacchari*

CCAAGTGATTCCATTCACCGTCTACCTGTGCTGTGCGCACGCTGTGTTGGACCGTTGTGTTGGCCCCACCAT

ATGCCCCTGCTCGCTTCGGCTGGGCGGGCACAGACCCAGTGTGTTGTTTTGGTCTGTGGCACACGGGAAGGC

ATCGCTCGGACAGCCTACCCTGCGAGCATCTTCGCTTTGGGGTGTTTGCTGCCGTTGGAGCCGGTATACTGG

CCCTTTGTGCTCCTCACGAGGGAAGGCCCGCCGAGCATGGGTCCGTGAGGTTGCACAACTGGGCTGGGGGTG

GATCGCCTTGCTGGTGGGTTCGCTGCTCCTTCGTCGTGTGGGCACGCTCGTGGGGTAACCAAACGGCTGTGC

TGGCGTCTGCGCGTCGTTGAGCAGTTGTTGTGCCTTGCACAGACACACTGAGCTGTATAACGTGCTAGTTGG

TCGTGTTCAGCTCTTACGTGCCGTAACTAGCGGTGTGTCTGTGCTTGTGTGCTGCGTCCGTGGCTGCGATGA

GACGACGTGGTAGGGCCCGTGCTTGGCTGATGATAGCACGTGGCTTAAGACTCAATGAGTGTCGGCTAGGCA

CCGCCAGCTTTTTTTCCATTAATTCATTTTTTTTGATGCCACTTTGTGTGGTAGAACAACAAATTCTAGTCT

TATCGGTGGATCACTCGGCTCGTGGATCGATGAAGAACGCAGCCAACTGCGATAATTAGTGCGAACTGCAGA

AACCTTGAGCACAAAACTTTCGAATGCACATTGCGCCATTGGAGTTACATCCATTGGCACGCCTGGTTCAGG

GTCGTTATCAAAAAGCGCACTGCTTTGTGCGTGTTGTGTTCGTGGGATCGTGTCTGCGAGAGACGTGTTCTT

GCGCTGGTGTTGATTGCTCGGCTGTGGACTGTGGTTATGCTGGCGCGAAATCGTCAGTTTTTTTTCGCGTTT

TACGCACCGTAACTTGGGCGTAGCTGCTGTCCATGTATGTGCTTGGGCTGAATGCAGAGAGGCATTCGTGTT

TTGAATT

>*H. sinensis*

TCCATTCACCGTCTACCTGTGCTGTTCAGCTGGACCGTTGTGTTGGCTCCACCAAGTGCCCCGGTCCGTGCA

CGCTTGATGTGCGGACGGGCACAGACCCGGTGGTTTTGGTCTGTGGCACACGGCAAAGCACCGCATGATGGA

CAGCCTACCCTGCGAGCATTGTCTTGGGGTGTTTGCTGCCGTTGGAGCCGGTATACCGTCTCGTTGGCCTCA

CGAGCGAGAGAGACCCGTGTGGACGGGGCCGTGGGGTGCAATCGAGCTGGTGGTGGATCGCCTTGCTGGTGG

GTTCGCTGCTCCATCGCGTAGCTGACACGCTCGTAGGGTAACCAAACGGCTGTGCTGGCGTCTGTGCGTCGT

TGAGTGGTTGTTGTGCCTTGCGCAGACACACTGAGCTGCAACTAGTTGGCAATGTTTCAGCTCTTACGTACC

GTAACAAGCGGTGTGTCTGTGCTTGTGTGCTACGTCCGTGGCTGCGATGAGACGACGCGGTAGGGCCCGTGC

TTGGCTGATGCTAGCACGTGGCTTAAGACTCAATGAGTGTCGGCTAGGCACCGCCAGCTTTTTTTTCATTTA

TTTAATTTTTTTAACCACTCATTGTGGTGGAACAAATTCTAGTCTTATCGGTGGATCACTCGGCTCGTGGAT

CGATGAAGAACGCAGCCAACTGCGATAATTAGTGCGAACTGCAGAAACCTTGAACACAGAACTTTCGACTGC

ACATTGCGCCATTGGAGTTACATCCATTGGCACGCCTGGTTCAGGGTCGTTATCAAAAAATGCACTGCTGTG

CGTGTTGTGCTCGTGGGATCGTGTTTGCGAGAACGCGTTCTTGCGCTGGTGTTGGGTGCTCGGCTGTGGACT

GCGGCTATGCTGGCGCGAAATCGTCAGTTTTTTTTCGCGTTTTACGTACCGTAACTCGGGCGTAGCCGTGGT

GTCCATGCATGCTTGGGCTGAACGCTCGCTCGTCTGCCCGACGAGGGACGTTC

>*H. sorghi*

CCAAGTGATTCCATTCACCGTCTACCTGCAGCTGTCCAGCTGCTGGACCGTTGTGTTGGCCCCACCACATGC

CCCTGTCTGCTGTGTTTTGGAGACGGGCACAGACCCGCTGTTGGTTTTGGTCTGTGGCACACACGGGAAGGC

GCCGAGTGTTGGACAGCAGCATACCCTGCGAGCACACTGCTGCTGCTTTGGGGTGTTTGCTGCCGTTGGAGC

CGGTATACTGGCTGCTGTTTGCCCTCACGAGAGAGAGGCGCAAATGGGCCGGTGGTGGATCGCCTTGCTGGT

GGGTTCGCTGCTCCTTCGTCAGTGTGACACGCTCGTAGGGTAACCAAACGGCTGTGCTGGCGTCTGTGCGTC

GTTGAGTGGTTGTTGTGCCTTGCACAGACACACTGAGCTGTGACTAGTTGTTGGTCCGTTGCAGCTCTTACG

TACCGTAACAAGCGGTGTGTCTGTGCTTGCGTGCTACGTCCGTGGCTKCGATGAGACGACGCGGTAGGGCCC

GTGCTTGGCTGATGGAGAGCACGTGGCTTAAGACTCAATGAGTGTCAGCTAGGCACCGCCAGCGTTTTTTTT

CCATTTATTCATTTTTTTTTGCCCACTTTGAAGTGGTACAACAATTCTAGTCTTATCGGTGGATCACTCGGC

TCGTGGATCGATGAAGAACGCAGCCAACTGCGATAATTAGTGCGAACTGCAGAAACCTTGAACACTAAACTT

TCGAATGCACATTGCGCCATTGGAGTTACATCCATTGGCACGCCTGGTTCAGGGTCGTTATCATAAAATGCA

CTGCTGTGCGTGTTGTGTTCGTGAGATCATGTCTGCGCTAGAGACGTGTTCTTGCGCCGGTGTTGGATGCTC

GGCTGTGGGCAGTGGTTATGCTGGCGCGAAATTGTCAGTTTTTTTTCGCGTTTTACACACCGTAACCAGGGG

CGTAGCTGTTGTCCATGTATGCTTGGGCTGAGTGCCATCCTGCCTGATGTGGTGGAGGCGTTCGCTTTCGAA

TT

>*H. vallicola*

TGCTGGATCATTACCCAAGTGATTCCATTCACCATCTACCTGCTGTCCAGTTGAACTGGCGCTTGGCACCGC

CATATGCCCTGTCTGTTGGTAGGTAGCAGACGGACACGGACCGTTGGTTTTGGTCTGTGAGCGCTGGGGAGA

CGCTGATTGGGCAGCTGCCCTACGAGCATGAGCGTTGGGGTGTCTTCCACACGTTGGTGCTGGTATGCTGGC

TCTTTGTCGTACGAGTAAAAGCCGTTGGTTGGCTGTACAACAGAGGGTTGGTGGCGAACTGCCTTTGCTGGT

TGGTTGGTTTGCTGCAGCAACGGAGGGAGCACGCTCGTAGGGCAACCTAACGGATGTGCTGGTGTCTGTGCG

TCGTTGAACGGTTGTTGTGCCTTGTGCATTACAGACTGACCGGGGACTGTGGTTATGTCCTCGGCCTTACGT

GCCGTAACTCGTGGTCTGTGTGTGCTTGGTGCTTGTCCGTGGCCGTGATGAGACGACGTGGTAGTGCCCTTG

CTTAGCGTGAGCATGTGGTTTAAGACTTAATGAGTGCAAGCGTGCACCGCCAGTATTTTTCTTTTTTCAATT

ATTTTTTTTACACACTTCCGAGTGAAGAAACAATTCTAGTCTTATCGGTGGATCACTCGGCTCGTGGATCGA

TGAAGAACGCAGCCAACTGCGATAATTAGTGCGAACTGCAGAAACCTTGAACACTAAACATTCGAATGCACA

TTGCGCCATTGGAGTTACATCCATTGGCACGCCTGGTTCAGGGTCGTTATCATAAAATGTACTGCTGTGCGT

GTTGATCTCGTGGGATCATGTCTGTTTGACGTGTTCTTGCGTTATGTTTGTGCCCGGCTGTGGGATTTGGTT

ATGCTAGCGCGAAACTGTCAGTTTATTTCGCGTTTTACACACCGTAACTCGGGCGTGGCCATTTCTCATGAA

TGCTGTGGTGGAATGCCTAGCATGTGGCGTTCCGTGTTTGAACTTTCGACCTGAACTCAGACGTGAGT

>*H. ripae*

CCAAGTGATTCCATTCACCATCTACCTGCTGTCCAGTTGAACTGGCGTTTGGCACAGCCATATGCCCTGTCT

GTTGGTAGGTAGCAGACGGACACGGACCGTTGGTGTTTTGGTCTGTGAGCGCTGGGGATACGCTGAGTGGGC

AGCTGCCCTACGAGCATGAGCGTTGGGGTGTCTTCCACACGTTGGTGCTGGTATGCTGGCTCTTTGTCGTAC

GAGTAAAAGCCGTTGGTTGGCTGTACGGCAGAGGGTTGGTGGCGAACTGCCGCCTTGCTGGTTGGTTGGTTT

GCTGCATCAACGGAGGGAGCACGCTCGTAGGGCAAACTAACGGATGTGCTGGTGTCTGTGCGTCGTTGAACG

GTTGTTGTGCCTTGCGCATTACAGACTGACCGGGGACTGTTGTGTGGTTATGTGTCCTCGGCCTTACGTGCC

GTAACTCGTGGTCTATGTGTGCTTGGTGCTTGTCCGTGGCCGTGATGAGACGACGTGGTAGTGCCCTTGCTT

AGCGTGAGCATGTGGTTTAAGACTTAATGAGTGCAAGCGTGCGCCGCCAGTATTTTTCTTTTTTCATTTATT

TTTTTTACACACTTCCGAGTGAAGAAACAATTCTAGTCTTATCGGTGGATCACTCGGCTCGTGGATCGATGA

AGAACGCAGCCAACTGCGATAATTAGTGCGAACTGCAGAAACCTTGAACACTAAACATTCGAATGCACATTG

CGCCATTGGAGTTACATCCATTGGCACGCCTGGTTCAGGGTCGTTATCATAAAATGCACAGCTGTGCGTGTT

GATCTCGTGGGATCATGTCTGTTTGACGTGTTCTTGCGTTATGTTTGTGCCCGGCTATGGGATTTGGTTATG

CTAGCGCGAAACTGTCAGTTTTTATTTCGCGTTTTACACACCGTAACTCGGGCGTGGCCATTTCTCATGAAT

GCTGTGGTGGAATATGCCTAGCATGTGGCGTTCCGTGTTTGTACTAACTTTCGACCTGAACTCAGACGTGAG

TACCCGCTGA

>*H. humili*

CCAAGTGATTCCATTCACCAACTACCTGCTGTCCAGTTTAACTGGCGTTTGGCACCGCCATATGCCTCTGTC

TGTCGGTAGCAGACGGACACGGACCGTTGGTTTTGGTCTGTGAGCGCTGGGGATACGCTGAGTGGACAGCTG

CCCTACGAGCATGAGCGTTGGGGTGTCTTCCACACGTTGGTGCTGGTATGCTGGCTCTTTGTCGTACGAGTA

AAAGCCGTTGGTTGGCTGTACGGCAGCAGAGGGTTGGTGGCGAACTGCCTTGCTGGTTGGTTTGCTGCAGCA

ACGGAGGGAGCACGCTCGTAGGGCAAGCTAACGGATGTGCTGGTGTCTGTGCGTCGTTGAACGGTTGTTGTG

CCTTGTGCATTACAGACTGACCGGGGACTGTGGTTATGTGTCCTCGGCCTTACGTGCCGTAACTCGTGGTCT

GTGTGTGCTTGGTGCTTGTCCGTGGCCGTGATGAGACGACGTGGTAGTGCCCTTGCTTAGCGTGAGCATGTG

GTTTAAGACTTAATGAGTGCAAGCGTGCACCGCCAGTATTTTTCTTTTTTCATTTATTTTTTTACACACTTC

CGAGTGAAGAAACAATTCTAGTCTTATCGGTGGATCACTCGGCTCGTGGATCGATGAAGAACGCAGCCAACT

GCGATAATTAGTGCGAACTGCAGAAACCTTGAACACTAAACATTCGAATGCACATTGCGCCATTGGAGTTAC

ATCCATTGGCACGCCTGGTTCAGGGTCGTTATCATAAAATGCACAGCTGTGCGTGTTGATCTCGTGGGATCA

TGTCTGTTTGACGTGTTCTTGCGTTATGTTTATGCCCGGCTGTGGGATTTGGTTATGCTAGCGCGAAACTGT

CAGTTTATTTCGCGTTTTACACACCGTAACTCGGGCGTGGGCCATTTCTCATGAATGCTGTGGTGGAATGCC

TAGCATGTGGCGTTCCGTGTTTGAACTTTCGACCTGAACTCAGACGTGAGTA

>*H. litoralis*

CCAAGTGATTCCATTCACCAACTACCTGCTGTCCAGTTGAACTGGCGTTGGCACCGCCATATGCCCTGTCTG

TTGGTAGCAGACAGCACTGACCTGTGGATTTGGTCTGTGAGCGCTGGGGATACGTTGTGTGGGCAGCTGCCC

TGCGAGCACGAGTGTTGGGGTGCTTTCCATACGTTGCTGCCTGGTATACAGGCTCTTTGTCGTACAAGTAAA

AGCCGTTGGTTGGCTGTGTGGCAAAGAGTTGGTGGCGGACTGCCTTGCTGGTTGGTTTGCTGCAGCAACGGA

GGGAGCACGCTCGTAGGGCAACCAAACGGACGTGCTGGTGTCTGCGCGTCGTTGAACGGTTGTTTGTGCCTA

GCGCATTACAGACTGACCGGGGACGTGGTTGTGTCCTCGGCCTTACATGCCGTAACTCGTGGTCTGTTTGTG

TTTTGGTGCTATGTCCGTGACCGTGATGAGACGATGTGGTAGTGCCCGTGCCTAGCCTGGGCACGTGGTTTA

AGACTTAATGAGTGCTAGCGTGCACCGCCAGCATTCCTCTTTTTTCAATTATTTTTTTTACACACTTCCGAG

TGAAGAAACAATTCTAGTCTTATCGGTGGATCACTCGGCTCGTGGATCGATGAAGAACGCAGCCAACTGCGA

TAATTAGTGCGAACTGCAGAAACCTTGAACACTAAACATTCGAATGCACATTGCGCCATTGGAGTTACATCC

ATTGGCACGCCTGGTTCAGGGTCGTTATCATAAAATGCACTGCTGTGCGTGTTTTTCTCGTGGGATCACGTC

TGTTTGATGTGTTCCTGCGTTATGTTTGTGCCCGGCTGTGGGATTTGGTTATGCTAGCGTGAAACTGTCAGT

TTATTTCACGTTTTACACACCGTAACTCGGGCGTGACCAATTCTCATGAATGCTGTGGTGGAATGCCTAGCA

TGTGGTGTTCCTTTTTTGAACT

>*H. fici*

GTGAACCTGCTGCTGGATCATTACC

CAAGTGATTCCATTCACCATCTACCTGCTGTCCAGTTGACCTGGCGTTGGGCACCGCCATATGCCCTGTCTG

TTGGTAGCAGACGGACACAGACCGTTGGATTTGGTCTGTGAGCGCTGGGAAGACGCTGAGTGGGCAGCTGCC

CTGCGAGCATGAGTGTTGGGGTGCTTTCCATACGTTGGTGCTGGTATGCTGGCTCCTTGCCGCACAAGTAAA

AGCCGTTGGTTGGCTGTGTGGCATTGAGCTGGTGGCGGACCGCCGGGCTGGTTGGTTTGCTGCAGCAACGGA

GGGAGCACGCTCGTAGGGCAACAAACGGATATGCTGGTGTCTGTGCGTCGTTGAGCGGTTGTTGTGCCTAGT

GCATTACAGACTGACCGGGGACTGTGGTGATGTCCTCGGCCTTACGTGCCGTAACTCGTGGTCTGTGTGTGC

TTGGGTGCGTGTCCGTGGCCGTGATGAGACGACGTGGTAGTGCCCTTGCTTAGCGTGAGCAATGTGGTTTAA

GACTTAATGAGTGCTAGCGTGTACCGCCAGCAATTCTCTTTTTTCAATTATTTTTTTACACACTTCCGTGTG

AAGAACAAATTCTAGTCTTATCGGTGGATCACTCGGCTCGTGGATCGATGAAGAACGCAGCCAACTGCGATA

ATTAGTGCGAACTGCAGAAACCTTGAACACTAAACATTCGAATGCACATTGCGCCATTGGAGTTACATCCAT

TGGCACGCCTGGTTCAGGGTCGTTATCAAAAAATGCACTGCTGTGCGTGTTGTTCTCGTGGGATCATGTCTG

TTTGACGTGTTCTTGCGTAATGTTGTGCCCGGCTGTGGGATTTGGTTATGCTAGCGCGAAACTGTCAGTTTA

TTTCGCGATTTTACACACCGTAACTCGGGCGTAGCCAATTCACATGCATGCTGCGGTGGAATGCCTGGCTTG

TGGCGTTCCGTCTTTGAACTTTCGACCTGAACTCAGACGTGAGTACTCCGCTGAACTTAAGCATATCAGTAA

GCGGGAGG

>*H. turcomanica*

CCAAGTGATTCCATTCACCACCTACCTGCTGTCCAGTTGAACCGGCGTTGGGCACTACCATATGCCCCGTCT

GCTGTTTGCGGACGAACACGGACCGTTGGTTTTGGTCTGTGAGCGCTGGGGATTCGCTGAATGGGCAGCTGC

CTTACGAGCACGAGTGTTGGGGTGCTGTCCTTACGTTGGTGCTGGTATGCTGGCTCTTTTCCACACGAGGGA

AAGCCGTTGGTTGGCTGTGTGGCGAAGAGTTGGTGGCGTACTGCCTCGCTGGTTGGTTTGCTGCACCAACGT

TGGTCGCACGCTCGTAGGGCAACCTAACGGCTGTGCTGGTGTCTGTGCGTCGTTGAGCGGTTGTTGTGCCTT

GTGCATTACAGACTGACCGGGGATGGTGGTTATGTCCTCGGTCGTACGTGCCGTACCTTGCAGTCTGTGTGT

ACTTGGTGCTACGTCCGTGGCCGTGATGAGACGACGTGGTAGGGCCCATGCTTAGCTTGAGCATGTAGCTTA

AGACTTAATGAGTGCTTGCTTGCACTGCCAGCGTTTTCTTTTTTTCATTTATTTTTTACACACTTCTGCGTG

AAGAAAAAAATTCTAGTCTTATCGGTGGATCACTCGGCTCGTGGATCGATGAAGAACGCAGCCAACTGCGAT

AATTAGTGCGAACTGCAGAAACCTTGAACACAAAACATTCGAATGCACATTGCGCCATTGGAGTTACATCCA

TTGGCACGCCTGGTTCAGGGTCGTTATCATAAAACGCAATGCACTGCGTGTTGTTGTCGTGAGATCATGTCT

GCACTGACGTGTTCTTGCGTTATGTTTGAGCCCAGCTGTGGGATTTGGTTGTGCCAGCGCGAATTTGTCAGG

TTTTTTCGCGTTTTACGCACCGTAACTCGGGCTGACCATTTCTCATTTTGCTGTGGTGGAATGCCTGGCATT

TGGCGTTCCGTCTTTGAACT

>*H. zeae*

TTGATTACGTCCCTGCCCTTTGTACACACCGCCCGTCGCTGCCCGGGACTGAGCCATTTCGAGAAATTCGGG

GACGGTTAGTGTGTCGGCTTCGGTCTTCACGCGGACTGGAACCGATTTAATCGCAGTGGCTTGAACCGGGCA

AAAGTCGTAACAAGGTTTCCGTAGGTGAACCTGCTGCTGGATCATTACCCAAGTGATTCAATTCACCAACTA

CCTGCCGTCCGCGAGGAACCAGTGATGGGCACCACCATATGCCCCGTTCGCTCTCGGGCGGACGGACACGGA

CCGTGTGGACCTGGTCCGTACCGCTGGGGACTCGCTGTTGGACGGCTGCCCTGCGAGCAACGCTTGTTGGGG

TGCTTTCCCTTTGTTGGCACTGGTATGCTAGCCTCTTCGTCAGCGCTGGACGAATGCTGGTGGCGGGCCGCC

TTGCTGGTTGGTTTGCTGTGCTGACTTAGGGAAGCTCGCTCGTGGGGCACCTAACGGCTGCGCTGGTGTCTG

TGCGTCGTTGAGCGGTTGTTGTGCCTTGCACACAATGCAGACTGGCCCGTGGACTGAATTGGTCTGTCCTCT

TGGCCTTACACACCGTAACTAGCGGTCTGCGTGTGCTTGTGTGCTACGTCCGTGGCCGTGATGAGACGACGC

GGTAGGGCTGCATGCGTGGCATTAGCATGTGGCTTAAGACTTGATGAGTGCTTAGCTTGCACCGCCAGCATT

TTTTCATCTACACAATTTTTTTTAAACTTCCAGAGTGAAGTAACGAAAAATTCTAGTCTTATCGGGTGGATC

ACTCGGCTCGTGGATCGATGAAAGAACGCAGCCAACTGCGATAACTAGTGCGAACTGCAGAAACCTTGAACA

CAAAACATTCGAATGCACATTGCGCCATTGGAGTTACATCCATTGGCACGCCTGGTTCAGGGTCGTTATCAC

AAAATGCACTGCTGTGTGCGTGTTGTTCTCGTGAGATCGCGTCTGCCTTTGACGTGTTCTTGCGCTATGTTC

GAGCCCAGCTGTGGGAACAAGGTTGTGCTAGCGTGGAACTGTGTTGATCTTCCACGCTTTGCGCACTGCGTA

ACTCGTGGCGCGACCTTGTCTCATGTACGCTGAGGTGGAATGCTGCTTGGCTTGGTGGCATTCTGCGCTTGA

ATTTTCGACCTGAACTCAGACGTGAGTACCCGCTGAACTTAAGCATAT

>*H. salixophila*

CCAAGTGATTCCATTCACCAACTACGTGCTGTCCGGTTGCATCAGCGTTTGGCACCACCACATGCCCCGTCT

GCTTTGGCTGACGGAATTGACCGTTCGAAGGTCTTTGAGCGCTGGGTGACGTTGAGTGGGCAGCCGCCCTAC

GAGCACATGTGTTGGGGTGCCTTCCTTACGTCGGTGCTGGTATGCTGACTCGGTCGCATAAGGGAAAGCCTG

TGGGTGGCTGTGCGGCAGAGTTGGTGGTGGGCTGCCTTGCGGGTGTGCTCGCTGCACCATCGGAGGAGGGTG

CGCTCGTTGGGCGACCTAACGGCTGTGCTGGTGTCTGTGCGTCGTTGAGCGGTTGTTGTGCCATGTGCATTG

CAGACTGGCCAGGGACGGTGGGGTTAGTCCCTGGCTTTACATACCGTAACTAGCGGTCTGTGTATGTGCTTG

TGTGCTGCGTCCGTGGCCGTGATGAGACGTCGTGTTAGGGCCCGTGCTTAGCGTAGCGCGTGGCTTAAGACT

TAATGAGTGCAGGCGTGCACTGCCAGCTTTTTCTTTTTTTCATTTATTTTTTTACACACTTCTGCGTGAAGA

ATGAAATTCTAGTCTTATCGGTGGATCACTCGGCTCGTGGATCGATGAAGAACGCAGCCAACTGCGATAATT

AGTGCGAACTGCAGAAACCTTGAACACTAAACATTCGAATGCACATTGCGCCATTGGAGTTACATCCATTGG

CACGCCTGGTTCAGGGTCGTTATCATTAAATGCACTGCTGTGCGTGTTGTTCTCGTGAGATCGAGTCTTTCG

GCACGTTCTCACGTCAAGTTTGTGCCCGGCTGTGGGATTTGGTTGTGCTAGCGCGGAATTGTAATTTTTCTT

TCGCGTTTTACGGACCGTAACTCGAGCGTAGCCTTTTTCCATGGATGCTGTGGCTGAATGCATGGCCTATGA

GCATTCCTATTTGAACT

>*H. daverti*

ATACCCAAGTGATTCCTATTCACCACCTACCTGCTGTCCTGTTGGGCGAGCGTTGGCACCACCAAATGCCCC

CGTCCGCTGACGGGCACAGGTCGTTCGAGATGACTTGTGGACGCTGCCCAACGTTACGGGGCAGCTGCCTCA

CGAGCCATGCTTTTGGGGTGCTTCCATACGTTGGAGCTGGTGTACCGCTCAGTGCTGCACATGTGAAAGCCT

GTGGATGGCTGCTGTGTGGCAATGTGTCGGTGGCGGGCCGCCTCGCTTGGTTGGTTCGCTGCGCCAACGGGG

TATGCACGCTCGTGGGGCGACCTAACGGCTGTGCTGGCGTCTGTGCGTCGTTGAGCGGTTGTTGTGGTAGGC

ACATAACACACTGACTGGGGATGGTGGTTTCGTTCCCAGTCTTACGTGCCGTAACTAGCGGTGTGTTTGTGC

TTGCTGCTACGTCCGTGGCCGTGATGAGACGACGCGGTAGGGCCCGTGCTTGGCCTAGCACGTGGCTTAAGA

CTCAATGAGTGTCAGCTCGGGCACCGCCAGCTTTTTCTTTTTTTTCATTATTTTTTTTACACTTCTGTTGAA

GAATGAATTCTAGTCTTATCGGTGGATCACTCGGCTCGTGGATCGATGAAGAACGCAGCCAACTGCGATAAT

TAGTGCGAACTGCAGAAACCTTGAACACAAAACATTCGAATGCACATTGCGCCATTGGAGTTACATCCATTG

GCACGCCTGGTTCAGGGTCGTTACCATAAAATGCACTGCTTGTGCGTTGCTTCGTGGGATCATGTACTTGTA

CGTGTTCTTACTTTACTTGCTCAGCTCGGCTGTGGGGTTTTGGTGTGCTGGCGCGAACTTGTGGTTCTAATT

CGCGTTTTACGGACCGTAACTCGGGCGCACCAGTCCTTCGCATGCTGTGGCGGAGTGCCTGGCTTACTGGCA

TTCCTGCTTTGATTTTTCGACCTGAACTCAAACTGAC

>*H. schachtii*

AATGGAACCGATTTAATCGCAGTGGCTTGAACCGG

GCAAAAGTCGTAACAATGTTTCCGTAGGTGAACCTGCTGCTGGATCATTACCCAAGTGATTCCTATTCACCA

CCTACCTGCTGCCCTGTTGGGCTAGCGTTGGCACCACCAAATGCCCCCGTCCGCTGACGGGCACAGGTCGTT

CGAGATGACCTGGGGACGCTGCCCAACATTACGGGGTAGCTGCCTCACGAGCCATGCTTTTGGGGTGCTTCC

ATACGTTGGAGCTGGTATACCGCTCAGTGCTGCACACGTGAAAGCCTGTGGATGGCTGCTGTGTGGCAATGT

GTCGGTGGCGGGCCGCCTCGCTTGGTTGGTTCGCTGCGCCAACGGGGGATGCACGCTCGTGGGGCGACCTAA

CGGCTGTGCTGGCGTCTGTGCGTCGTTGAGCGGTTGTTGTGGCAGGCACATAACACACTGACTGGGGATGGT

GGTTTCGTTCCCGGTCTTACGTGCCGTAACTAGCGGTGTGTTTGTGCTTGCTGCTACGTCCGTGGCCGTGAT

GAGACGACGCGGTAGGGCCCGTGCTTGGCCTATGCACGTGGCTTAAGACTCAATGAGTGTCAGCTCGGGCAC

CGCCAGCTTTTTCTTTTTTTTTCATTATTTTTTTTTACCACTTCTGTTGAAGAATGAATTCTAGTCTTATCG

GTGGATCACTCGGCTCGTGGATCGATGAAGAACGCAGCCAACTGCGATAATTAGTGCGAACTGCAGAAACCT

TGAACACAAAACATTCGAATGCACATTGCGCCATTGGAGTTACATCCATTGGCACGCCTGGTTCAGGGTCGT

TACCATAAAATGCACTGCTTGTGCGTTGCTTCGTGGGATCATGTACTTGTACGTGTTCTTACGTTACTTGCT

CAGCTCGGCTGTGGGGTTTTGGTGTGCTGGCGCGAACTTGTGGTTCTAATTCGCGTTTTACGGACCGTAACT

CGGGCGCACCAGTCCTTCGCATGCTGTGGCGGAGTGCCTGGCTTACTGGCATTCCTGCTTTGATTTTTCGAC

CTGAACTCAGACGTGAACACCCGCTGAACTTAAGCATATAAG

>*H. ciceri*

GTGAACCTGCTGCTGGATCATTACCCAAGTGATTCCTATTCACCCACCTACCTGCTGTCCTGTTGGGCTAGC

GTTGGCACCACCAAATGCCCCCGTCCGCTGACGGGCACAGGTCGTTCGAGATGACTTGTGGACGCTGCCCAA

CATTACGGGGCAGCTGCCTCACGAGCCATGCTTTTGGGGTGCTTCCATACGTTGGAGCTGGTGTACCGCTCA

GTGCTGCACATGTGAAAGCCTGTGGATGGCTGCTGTGTGGCAATGTGTCGGTGGCGGGCCGCCTCGCTTGGT

TGGCTCGCTGCACCAACGGGGGATGCACGCTCGTGGGGCGACCTAACGGCTGTGCTGGCGTCTGTGCGTCGT

TGAGCGGTTGTTGTGGTAGGCACATAACACACTGACTGGGGATGGTGGTTTCGTTCCCAGTCTTACGTGCCG

TAACTAGCGGTGTGTTTGTGCTTGCTGCTACGTCCGTGGCCGTGATGAGACGACGCGGTAGGGCCCGTGCTT

GGCCTAGCACGTGGCTTAAGACTCAATGAGTGTCAGCTCGGGCACCGCCAGCTTTTTCTTTTTTCTCATTAT

TTTTTTTACACTTCTGTTGAAGAATGAATTCTAGTCTTATCGGTGGATCACTCGGCTCGTGGATCGATGAAG

AACGCAGCCAACTGCGATAATCAGTGCGAACTGCAGAAACCTTGAACACAAAACATTCGAATGCACATTGCG

CCATTGGAGTTACATCCATTGGCACGCCTGGTTCAGGGTCGTTACCATAAAATGCACTGCTTGTGCGTTGCT

TCGTGGGATCATGTACTTGTACGTGTTCTTACGTTACTTGCTCAGCTCGGCTGTGGGGTTTTGGTGTGCTGG

CGCGAACTTGTGGTTCTAATTCGCGTTTTACGGACCGTAACTCGGGCGCACCAGTCCTTCGCATGCTGTGGC

GGAGTGCCTGGCTTACTGGCATTCCTACTTTGATTT

>*H. glycines*

GTTTCCGTAGGTGAACCTGCTGCTGGATCATTACCCAAGTGATTTCCTATTCACCACCTACCT

GCTGTCCTGTTGGGCTAGCGTTGGCACACACCAAATGCCCCCGTCCGCTGATGGGCACAGGTCGTTCGAGAT

GACTTGTGGACGCTGCCCAACATTACGGGGCAGCTGCCTCACGAGCCATGCTTTTGGGGTGCTTCCATACGT

TGGAGCTGTGGTATACCGCTCAGTGCTGCACATGTGAAAGCCTGTGTATGGCTGCTGCGTGGCAATGTGTCG

GTGGCGGGCCGCCTCGCTTGGCTGGTTTCGCTGCGCCAATGTGGGATGCACGCTCGTGGGGCGACCTAACGG

CTGTGCTGGCGTCTGTGCGTCGTTGAGCGGTTGTTGTGGCAGGCACATAACACACTGACTGGGGATGGTGGT

TTCGTTCCCGGTCTTACGTGCCGTAACTAGCGGTGTGTTTGTGCTTGCTGCTACGTCCGTGGCCGTGATGAG

ACGACGCGGTAGGGCCCGTGCTTGGCCTAGCACGTGGCTTAAGACTCAATGAGTGTCAGCTCGGGCACCGCC

AGCTTTTTCTTTTTTTTTTCATTATTTTTTTTTACACTTCTGTTGAAGAATGAATTCTAGTCTTATCGGTGG

ATCACTCGGCTCGTGGATCGATGAAGAACGCAGCCAACTGCGATAATTAGTGCGAACTGCAGAAACCTTGAA

CACAAAACATTCGAATGCACATTGCGCCATTGGAGTTACATCCATTGGCACGCCTGGTTCAGGGTCGTTACC

ATAAAAATGCACTGCTTGTGCGTTGCTTCGTGGGATCATGTACTTGTACGTGTTCTTACGTTACTTGCTCAG

CTCGGCTGTGGGGTTTTGGTGTGCTGGCGCGAACTTGTGGTTCTAATTCGCGTTTTACGGACCGTAACTCGG

GCGCACCAATGCTTTGCATGCTGTGGCGTGACGTGCCTGGATTACTGGCATTCCTGCTTTGATTTTTCGACC

TGAACTCAGACGTGAACACCCGCTGACTACTTAAGCATAT

>*H. medicaginis*

CCAAGTGATTCCTATTCACCACCTACCTGCTGTCCTGT

TGGGCTAGCGTTGGCACCACCAAATGCCCCCGTCCGCTGATGGGCACAGGTCGTTCGAGATGACTTGTGGAC

GCTGCCCAACATTACGGGGCAGCTGCCTCACGAGCCATGCTTTTGGGGTGCTTCCATACGTTGGAGCTGTGG

TATACCGCTCAGTGCTGCACATGTGAAAGCCTGTGTATGGCTGCTGCGTGGCAATGTGTCGGTGGCGGGCCG

CCTCGCTTGGTTGGTTCGCTGCGCCAATGTGGGATGCACGCTCGTGGGGCGACCTAACGGCTGTGCTGGCGT

CTGTGCGTCGTTGAGCGGTTGTTGTGGCAGGCACATAACACACTGACTGGGGATGGTGGTTTCGTTCCCGGT

CTTACGTGCCGTAACTAGCGGTGTGTTTGTGCTTGCTGCTACGTCCGTGGCCGTGATGAGACGACGCGGTAG

GGCCCGTGCTTGGCCTAGCACGTGGCTTAAGACTCAATGAGTGTCAGCTCGGGCACCGCCAGCTTTTTCTTT

TTTTTTCATTATTTTTTTTTACACTTCTGTTGAAGAATGAATTCTAGTCTTATCGGTGGATCACTCGGCTCG

TGGATCGATGAAGAACGCAGCCAACTGCGATAATTAGTGCGAACTGCAGAAACCTTGAACACAAAACATTCG

AATGCACATTGCGCCATTGGAGTTACATCCATTGGCACGCCTGGTTCAGGGTCGTTACCATAAAATGCACTG

CTTGTGCGTTGCTTCGTGGGATCATGTACTTGTACGTGTTCTTACGTTACTTGCTCAGCTCGGCTGTGGGGT

TTTGGTGTGCTGGCGCGAACTTGTGGTTCTAATTCGCGTTTTACGGACCGTAACTCGGGCGCACCAATGCTT

CGCATGCTGTGGCGGAGTGCCTGGATTACTGGCATTCCTGCTTTGGATTT

>H*. mediterrania*

GTTTCCGTAGGTGAACCTGCTGCTGGATCATTACCCAAGTGATTCCTATTCACCACCTACCTGCTGTCCTGT

TGGGCTAGCGTTGGCACCACCAAATGCGCCCGTCCGCTGACGGGCACAGGTCGTTCGAGAAGACCTGTGGAC

GCTGCTCAACATTACGGGGCAGCTGCCTCACGAGCCATGCTTTTGGGGTGCTTCCCTACGTTGGGGCTGGTA

TACCGCTCAGTGCTGCACATGTGAAAGCCTGTGGGTGGCTGTTGTGTGGCAATGTGTTGGTGGCGGGCCGCC

TCGCTTGGTTGGTTCGCTGCACCAGCGGGGGATACACGCTCGTGGGGCGACCTAACGGCTGTGCTGGCGTCT

GTGCGTCGTTGAGCGGTTGTTGTGGCGGGCACATAACACACTGACCGGGGATGGTGGTTTCGTCCCCGGTCT

TACATGCCGTAACTAGCGGTGTTGTTAGTGCTTGCTGCTGCGTCCGTGGCCGTGATGAGACGACGCGGTAGG

GCCCGTGCTTGGCCTAGCACGTGGCTTAAGACTCAATGAGTGTCAGCTCGGGCACCGCCAGCTTTTTCTTTC

TTTTTTTTCATTATTTTTTTTATACTTCCGTTGAAGAATGAATTCTAGTCTTATCGGTGGATCACTCGGCTC

GTGGATCGATGAAGAACGCAGCCAACTGCGATAATTAGTGCGAACTGCAGAAACCTTGAACACAAAACATTC

GAATGCACATTGCGCCATTGGAGTTACATCCATTGGCACGCCTGGTTCAGGGTCGTTACCATAAAATGTACA

GCTTGTGCGTTGCTTCGTGGGATCATGTACTTGTACGTGTTCTTACGTTACTTGCTTAGCTCGGCTGTGGGG

TTTTGGTGTGCTGGCGCGAACTTGTGGTTCTAATTCGCGTTTTACGGACCGTGACTCGGGCGCACCAATTCT

TCGCATGTTGTGGCGGAGTGCCTGGCTTACTGGCATTCCTTCTTTGATTTTTCGACCTGAACTCAGACGTGA

ACACCCGCTGAACTTAAGCATAT

>*H. cajani*

GTTTCCGTAGGTGAACCTGCTGCTGGATCATTACCCATGTGATTCCATTCACCACCTACCTGCTGTCCCATT

GGGCTAGCAGTGGCACCTCCATATGCCCCCGTCTGCTGACGGGCACGGGCCGTTTGCGAAGGTCTGTGCTGC

TGTTCAATGTGCAAGGACAGCTGCTTAGCGAGCAAAGCTGTTGGGGTGTCATCAGCGGTTGGAGCTGGTAAA

CCGTTCACTAGCACACAAGTGGAAGCCTGAGGTTGGGCTGTGTGCAGTGGTGCGGTGGCGAACTGCCTTTGG

GTATGGTTTGCTGCGCCAACTGATGGGACACGCTCGCTGGGCTCTGAACGGCTGTGCTGGCGTCTGTGCGTC

GTTGAGCGGTTGTTGTGCCTTGCATTAACACACTGACCGGGGAGCTGGTTGTTTCCCCGGCCTTACGGACCG

TAACTAGCGGTGTGTTGATGTTTGCGCGCTGCGTCCGTGGCCGTGATGAGACGACGCGGTAGGGCCCGTGCT

TCGCTTAGCATGTGGCTTAAGACTCAATGAGTGTCAGCTCGGGCACCGCCAGCTTTTTTCTTTTTTTCATTA

TTTTTTTTCGAACTTCTGTTGAAGAGTGAAATTCTAGTCTTATCGGTGGATCACTCGGCTCGTGGATCGATG

AAGAACGCAGCTAACTGCGATAAATAGTGCGAACTGCAGAAACCTTGAGCACAAAACTTTCGAATGCACATT

GCGCCATTGGAGTTACATCCATTGGCACGCCTGGTTCAGGGTCGTAACCATAAAACGCTCTGCTTTGCGTGT

TGCTCTCGTATGATCATGCTTTTTGAGCGTGTTCATACGCTGAGTAAGCCCGGCTGTGTGGTTTAGTTGTGC

TAGCGCGGAATTGTGGTTTGATTCGCGTTTTACATGCCGTAACTTGAGCACAACGTGAGCTGCACTTGCTGT

GGTGGATTGTCTTGCTTACAGCAGTCCTGCTTTGATTTTTCGACCTGAACTCAGACGTGAACACCCGCTGAA

CTTAAGCATAT

>*H. cyperi*

CCACGTGATTCCAATTCACCACCTACCATTTGCTGTCCTATTGTTGTGTCTTGGCATTCGGCACCGCCAAAT

GCCCTTGTCCCATGCGGGACCGGCGCGGACCGATTGGGAGTGGGTCTGCGATTGCCAAGGTCGACGTTGTGT

TTTCACACGGGGCAGCTGTCCTGCGGGCGCAGCGCCTGTTGGGATGCTTTCGCCGGGTTGGAGCACGTATGC

GGGCCTAGTTGTTGTGCACAAGTATAAGCCTGTGGTTGGCTGTGCATGCGCTGGGCTGGTGGCTGGTCACTA

TTGGCGTCGTCCAATTGTCGGTTAGCCGCTCCAACGAGGCGGAGCATGCCCGTGGGACTTTGAACGGCTGTG

CTGGCGTCTGTGCGTCGTTGAGCGGTTGTTGTGCCTTGCTCAGGCGGACTGGCCGTGAATGGTGTGGACTTG

TGTTCTCGGCCTCACGTGCCGTGACCAGTGGTCTGTCTGTGCTTGTGTGCTACGTCCGTGGCCGTGATGAGA

CGACGTGTTAGGGCCCGTGCGAGGCACGTGGTTTAAGACTCAATGAGTGTCAGCTAGGGCACCGCCAGCGTT

TTTTTTCTTTATTTATTTTTTTAAACGCTTCTTCGGAAGTTGACAAAAAATTCTAGTCTTATCGGTGGATCA

CTCGGCTCGTGGATCGATGAAGAACGCAGCCAACTGCGATAATTAGTGTGAACTGCAGAAACCTTGAACACA

GAAAATTCGAATGCACATTGCGCCAGTGGAGTTAAATCCATTGGCACGCCTGGTTCAGGGTCGTTACCATAA

AATGCACTGCTGTGCATGTTTGCAATGGTGTGGGATCGTGTGTGGTGCTGCATACACGCGTTCCCACTCTCT

CTGTCGATGAGCCCGGCAGCTGCGGGGTGGGGTTGTGCCAGCGTGGAATTGTACGAGCTGTTTTCCTCGCTT

TACACACCGTAACTTGGGCACCCCGTTCCCCGCCGGCCGCTGTGGCTGCTGAATGCTTTGCCGCAGGCATTC

GCTGCTCTTTGCT

>*H. elachista*

TTGATTACGTCCCTGCCCTTTGTACACACCGCCCGTCGCTGCCCGGGACTGAGCCATTTCGAGAAATTCGGG

GACGGTTAGTGTGGCGGCTTCGGTCGCTGCACGGACTGGAACCGATTTAATCGCAGTGGCTTGAACCGGGCA

AAAGTCGTAACAAGGTTTCCGTAGGTGAACCTGCTGCTGGATCATTACCCACGTGATTCCAATTCACCACCT

ACCCTCGCTGCCTAGCAGTTGCCTCAGCATTCGGCACCGCCAAATGCTCTCTGTCCATGTCAGGACGAGCGC

GGATCGTTCGGGAGAAGATCTGCGAATGCTGGGGTTTGCACATGGGCAGCTGTCCTGCGGGCGCAGCTTGGG

ATGCTTTTCGCCGAGGTTGGAGCTGGTATGCGGGCCCAATGTTGTGCACAAGTGTAAGCCTGTGGTTGGCTG

TGCACGCATTGCGCTGGTTGCGGACCACCATCGCTGGTCGGTTTGCTGCTCCAACGAGGCGAGGGCATGCCC

GTGGGACTGTGAACGGCTGTGCTGGCGTCTGTGCGTCGTTGAGCGGTTGTTGTGCCTTGCTCAGATGGACCG

GCCGAGAATGGTGTTGAGTTGTGTTCTCGGTCTCACGTACCGTGTGGAGGTCTGTCTGTGTTTGGGTGCTAC

GTCCGTGGCCGTGATGAGACGACGTGTTAGGGCCCGTGCGAGGCGCGTGGCTTAAGACTCAATGAGTGTCAG

CTAGGGCACCGCCAGCGTTTTCTTTTTTCAATTATTTTTTTATACACTTTCTTCGGAAGGTTGACAATGAAA

TTCTAGTCTTATCGGTGGATCACTCGGCTCGTGGATCGATGAAGAACGCAGCCAACTGCGATAATTAGTGTG

AACTGCAGAAACCTTGAACACAGAAACTTCGAATGCACATTGCGCCAGTGGAGTTAAATCCATTGGCACGCC

TGGTTCAGGGTCGTTACCATAAAGTGCACCGCAGTGCATGTTTGCAAAGGTGTGGGGATCGTGTGTTGCACA

ACACGCGTTCTTGCTCTCTCTGTCAATTGGTCCGGCAGCTGTGGGGGTTTGGGGTTGTGCTTGGCGTGGATT

GTATGAACTGTTTTCCTCGCTTTACACACCGTAACTTGGGCACTCCGCTCCCCATCAGTTGCTGAGACTGGT

GAATGCTTTGCGCCATGAGCATTCGCTTCTCTTTTATTTTTCGACCTGAACTCAGACGTGAACACCCGCTGA

ACTTAAGCATATCAGTAAGCGGAGGAAAAGAAACTAACGAGGATTCCCTTAGTAACGGCGAGTGAAA

>*H. oryzicola*

CCACGTGATTCCAATTCACCACCTACCCCATGCTGTCCTGCTGTTGTTGCCTTTGCTTCTGGCACCACCAAA

TGCCCCTGTCCCAGCCACAAGCAGATGGGTGGGACGGGCGCAGACCGATCGGGAGTGGTCTGCTGRGTTGCT

CAGGTGTTGACAACACGCGGGGCAGCTGTCCTGCGGGCGCAGCGCCAGTTGGGATGTCTCCTCCAGGGTTGG

ACTGCTGCTCCAGTGAGGAGGGGGCATGCCCGTAGGACTGTGAACGGCTGTGCTGGCGTCTGTGCGTCGTTG

AGCGGTTGTTGTGCCTTGCTCAGATGGACTGGCCGAGAATGGTGTGAGTAGTGTTCTCGGTCTCACATACCG

TGACCAGTGGTCCGTCTGTGCCTGTGTGCTACGTCCGTGGCCGTGATGAGACGACGTGTTAGGGCCCGTGCG

AGTCGCGTGGCTTAAGACTCAATGAGTGTCAGCTAGGGCACCGCCAGCGTTTTTTCTTTTTTAATTATTTTT

TTGAACACTTCTGCGGAAGTTTGACAACNAAATTCTAGTCTTATCGGTGGATCACTCGGCTCGTGGATCGAT

GAAGAACGCAGCCAACTGCGATAATTAGTGTGAACTGCAGAAACCTTGAACACAGAAAATTCGAATGCACAT

TGCGCCAGTGGAGTTAAATCCATTGGCACGCCTGGTTCAGGGTCGTTACCATAAAGTGCACCGCTGTGCATG

TTTGCAATGACGTGGGATCGTGTGTGATGATAACACGCGTTCCCGCTCTCCCTGTCGATGGGCCCGGCAGCT

GTGGGGTTGGGGTTGTGCTAGCGTGGAATTGTACGAGCTGTTTTCCTCGCTTTACACACCGTAACTTGGGCA

TACCGCTCCCCGTTGGCTGTACCGCGGCTGTTGAATGCTTTGCTGCAGGCATTCACTGCTCTTTGCT

>*H. guangdongensis*

GTTTCCGTAGGTGAACCTGCTGCTGGATCATTACCCATGTGATTCCAATTCACCACCTACCACCAATGCTGT

CCAGCGGAGTTGCCTTGGCATTCGGTGCCGCCAAATGCCCCCGTCCTTTCGCGGCGCACGACCAGGGCGGGT

GCGGACCATTCGGGAGTTGGTCTGCAAAAGCTGGGGTGACTCACGCACACACACACACGCGGGCAGTTGTCC

TGCGGGCGCAGCGCTTGTTGGGATGCTTTCTCCAGAGTTGGGACAGGTATGCGGGCCCCAGGTTTTGCACAA

GTGTAAGCCGGTGGTTGGCTGTGCATATACGCTTTGTTGGGCTTGTGGCGGATCACCATTTGGTCGGTTTGC

CGCTTCAACGAGGAGAGGGCATGCCCGTAGGACTGTGTGTGAACGGCTGTGCTGGCGTCTGTGCGTCGTTGA

GCGGTTGTTGTGCCTTGCTCAGGTGGACTGGCCGAGAATGGTGTGGATTTGTGTTCTCTGGTCTACCACCCA

TTCACGTACAGTGACACTGGGTTGTGTGGTCTGCCTGTGCCTGTGCGCTACGTCCGTGGCCGTGATGAGACG

GCGCGTTAGGGCCCGTGCGAGGCACGTGGCTTAAGACTCAATGAGTGTCAGCTAGGGCACCGCCAGCGTTTT

TTTCTTTTTTTAATTATTTTTTATGCACACTTCCGCATGGAAGGTTGACAATGAAATTCTAGTCTTATCGGT

GGATCACTCGGCTCGTGGATCGATGAAGAACGCAGCCAACTGCGATAACTAGTGTGAACTGCAGAAACCTTG

AACACAGAACATTCGAATGCACATTGCGCCAGTGGAGTTAAATCCATTGGCACGCCTGGTTCAGGGTCGTTA

CCATAAAGTGCACCGCTGTGCATGTTTGTAAAGACGTGAGATCGTGTGTGTGTGTGTGTGTGTGTGTGTTGG

TTGCAGCACCACACACACGCGTTCTTGCTGTGTGGATGTGTGCCCGGCAGCTGTGGGGTTGGGGTTGTGCTA

GCGCGGATTGTATGGCTTGCTGGTCTTCCTCGCTTGGTCACTCCGCTCCCCGCTGGCTTTGCCGTGGCTGCT

GCTGAATGCTTTGCCGCGAGCGAGCATTCGCGCACCTCTTGTCTTTCGACCTGAACTCAGACGTGAGCACCC

GCTGAACTTAAGCATAT

>*H. mothi*

CCAAGTGATTCCAATTCACCACCTACTATTTGCTGTCCTGCTGTTGCCTTGGCATTGGTCACCACCAAATGT

CCCTGTCCCAGCTGGGACGGGCGCGGACCGATAGGGAGGGGGTCTGCGTTTGCTGGGGTCGACGTATTCACA

CAGGGCAGCTGTCCTGCGGGCGCAGCGCTTGTTGGGATGTTTTCTCCGAATTGATGCTTTTATGCGGGCCCA

GTGATTTTGCACAAGTGTGTAAGCCTGTGGTTGGCTGTGCATGAGCTGGGCTAGTGGCGGACCACCATTGTC

GTCATTGATGGTCGGTTTGCTGCACCGACAAGGAGGGAGCATGCTCGTAGGACTGTGAACGGCTGTGCTGGC

GTCTGTGCGTCGTTGAACGGTTGTTGTACCTTGCTCAGATGGGCTGGCCAAGAATGGTGCGGAGTTGTGTTC

TTGGTCTCACCTACCGTGACCAGCGGTTTGTCTGTGCTTGTGTGCTACGTCCGTGGCCGTGATGAGACGACG

TGTTAGGGCCCGTGCGAGGCGCGTGGCTTAAGACTCAATGAGTGTCAGCTAGGGCACCGCCAGCGTTTTTTT

TTTTAATTATTTTTTTATATGACTTCTTTGGAAGTTTTGATGAAAAATTCTAGTCTTATCGGTGGATCACTC

GGCTCGTGGATCGATGAAGAACGCAGCCAACTGCGATAATTAGTGTGAACTGCAGAAACCTTGAACACAGAA

AATTCGAATGCACATTGCGCCAGTGGAGTTAAATCCATTGGCACGCCTGGTTCAGGGTCGTTACTATAAAAT

GCGCAGCTGTGCATGTTGGAATGGCGTGGTATCGTGTGTGCTGCACACGCGTTCCCGCTCGGTGATTGGGCC

CGGCAGTTGTGGGTTGGGGTGGTGCTAGCGTGGAATTGTATGAGCTTTTTTCTCGCTTTACACACCGTAACT

TGGGCACTACACTCCCTGCTGACTGCCGTGGCTGCTGAATGCTTTGCCGCAGGCATTCGTTGCTCTTTTGCT

TCGA

>*H. fengi*

GTTTCCGTAGGTGAACCTGCTGCTGGATCATTACCAACGTGATTCCAATTCACCAACTACACTCACATGCCG

TCCGTTGTTGTCTTTGTGCGGGCGGCACCACCGCCAGATGCGCCTGTCCACGCAGCAAGAGAGGAGGGGACA

GGCGCAGACCCCGTCTTGGGGAGTGGGTCTGCGCATGCGCAACACCGGGCGGCAGTTGCCCTGCGGGCGCAG

CGCGCTTGTTGGGATGCTTTCTCATTGGGGTTGGGGCCGGAAATGCGGGTCCGGTGCTTTGCGCAAGTGTGA

GTGAGCCTGTGGTTGGCTGTGCTTCAGGCGCTGGGCTGGTGGCGGATCACCATCGGAGCGGATGGTCGGTTT

GCCGCCCCAAGCGAGGAGGGGGCATGCCCGTAGGGCTGTGAACGGCTGTGCTGGCGTCTGTGCGTCGTTGAG

CAGTTGTTGTGCCTTGCTGATCAGATGGACTGGCCGCGAGAATGGTGTGGAGTTATGCTCTCGAGTGGTCTG

TCTGTGTGCTTGTGTGCTACGTCCGTGGCTGTGATGAGACGACGTGTTAGGGTCCGTGCGAGGCGCGTGGCT

TAAGACTCAATGAGTGTCAGCTAGGGCACCGCCAGCATTTTCTTTTTTTTTAATTATTTTTTTTTTGCGCAC

TTCTTTGGAAGGTTGACAATGAAATTCTAGTCTTATCGGTGGATCACTCGGCTCGTGGATCGATGAAGAACG

CAGCCAACTGCGATAATTAGTGTGAACTGCAGAAACCTTGAACACAGAAAATTCGAATGCACATTGCGCCAG

TGGAGTTAAATCCATTGGCACGCCTGGTTCAGGGTCGTTACCGTAAAATGCACCGCTGTGCACGTTTACAAT

GGTGTGGGATCGTGTGTGTGTGTGTGTTTTGCGTGCAAAACACACACACACGTTCTCATTCCCTTTTTGCGA

TGGCCCGGCAGCTGTGGGGTTGGGGTTGTGCTAGCGTAGAATTGTACGAGCGATTTTCCACGCTTTACGCAC

TGCGCGTAACTTGGGCACTCCGCTCCCTGTTGGCTGTGCCGTGGCTGCTGAATGCTTTGTGCCGCTGGCATT

CGCTGCTCTTTGCTTTCGACCTGAACTCAGACGTGAACACCCGCTGAACTTAAGCATAT

>*H. hainanensis*

GTTTCCGTAGGTGAACCTGCTGCTGGATCATTACCCAAGTGATTCACATTCACCACCTACCTCACTGCTCCG

TTCGCTTGTCAGGTGGGCACTGCCATATGCCTCCGTCCTGGCTGTGCATGGACGGACACGGGCCTGTGTGGA

TTGGCCTGTGCACCGGGGCGGACGGGCAGGAGCCCTGCAGAGAGCTGCTTTGGGGTGCGTTCAGGCGTTGGA

GCACGGTATGCCGGGCCATTTGGCTTGGTGGCTTATCACCARTGCGCTGTTGGTCGATTTGCCGCTCCGACG

ACTGGATTCACTTCTGCAGGGCCTGAACGGATGTGCTGGTGTCTGCTCGTCGTTGAACGGTTGTTGCGCCGT

GCGCTGACACGCTGACCGGAGAGTGTGAGCCTTGCTCCCGGTCTTACGGACCGTAACTAGCGGTGTGTCTTG

CACGTGTGCTTTGTCCGTGGCCGCGATGAGACGACTTGGTAGGGCCTGTGCTCAGCATGGCACATGGCTTCA

GACTTAATGAGTGCCAGCGCGGCACCGCCAGCATTTCTCTTTTTTCAATTATTTTTTTTTGTTGCGCTTCTT

CGGAAGGAGAACAAGCAAATTCTAGTCTTATCGGTGGATCACTCGGCTCGTGGATCGATGAAGAACGCAGCC

AACTGCGATAATTAGTGTGAACTGCAGAAACCTTGAACACTGAGCTTTCGAATGCACATTGCGCCATTGGAG

TTACATCCATTGGCATGTCTGGTTCAGGGTCGTAACCGTAAAACGCCATGCATTGCGCGTGTTTGAGCCGTT

AGATCACGTGAACAGCGTGTTCTCTTGGACTTGGTGGTTAGTCCCGGCATGGGGTCTGGTGTTGTCAGCGCG

AAATTGTGTGCTAATTCGCGTTTTGCGTACCGCAACTCGGGCACTCCGCTCCCCATGTGCTGTGGCAGCAGG

ATGTCTTGGCCATTGGGCGTCCGTGCACATTGACTTTTCGACCTGAACTCAGGCATGATTACCCGCTGAACT

TAAGCATAT

>*H. cynodontis*

CCAAGTGATTCACATTCACCACCTACCTTCTGCTCTGCAGTTGTTCGGTTTGTTGCGGGCAACCACCATA

TATGCCTTCTCCGTTGGACAACAGCGGAGGACACGGGCCTGAGTGAGTGGCCTGTGCGCAGCGGTCGACA

CACGCAGGGTGTCTCTAGAAGTCGGAGCTTGGTATACTGGGCACACGCAGCCTGTGTGCTCGGTGGCTTA

TCAGCAGCCGGCTGCTGCCGCTGGTTTGCCGCGCTCTTAGAGGACTGGAGCACGCCCGTGGGGCGCCCTA

ACGGCTGTGCTGGCGTCTGTGCGTCGTTGAGCGGTTGTTGTGCCTTGCTTGTGGGACACACTGGCCGAGA

GTGTTGTGCTTGCTCTCGGTCTTACGTGTGCCGTAACTTGCGGTGTGTCCCTTGCTTGTGTGCTACGTCC

GTGGCCGTGATGAGACGACGTGGTAGGGCCTGTGCTCGGCCGATGCACATGGCTTAAGACTCAATGAGTG

CCCGCACGGCACCGCCAGCGTTTTTTTCTTTTCAATTATTTTTTTTCAATCACTTCTTCGGAAGCTGAAT

AAATTCTAGTCTTATCGGTGGATCACTCGGCTCGTGGATCGATGAAGAACGCAGCCAACTGCGATAATTA

GTGTGAACTGCAGAAACTTTGAACACTGAGATTTCGAATGCACATTGCGCCATTGGAGTTACATCCATTG

GCATGTCTGGTTCAGGGTCGTTACCCTAAAACGCACTGCAAATGCGTGTTGTGTTCCTGGGATCACGTGT

GCTTCGGCCGTGTGTTCTCGTGGCTTTGTGTTGGTTGGGCCCGGCATGTGGGTGTTCTGGATGTGTCAGC

GCGAAATTGTGTTGTTTTTGCGTTTTACACACCGTAACTTGGGCGCTCCAGCGCCCATGTGCCGAGGCAG

GATGCATCGGCATTGAGCATCCGGCGAGAATTGACTT

>*H. bifenestra*

CGTAACAAGGTAGCTGTAGGTGAACCTGCTGCTGGATCATTACCCATGTGATTCACATTCACCAGCTATCAA

TCTGCCCTTGGGCTGACTCTCTGATTGTGGTGACGTTGTTGTGGGCACAACCATATGCCTTCGCTGTGCTGT

TTGCGCAGTGGACATGGGCCTGTGTGCATTGGCCTATGCACAGCGGCGACATCATGTTGGCGCTTGGGCGGA

TATGCTCTGCGGGAAAACAGCATTGTTGTGTGTCTTCGGAAATCAGAGCATGTGTATGCCAAGCTCTACAGC

TTGGTGGCTTATCAACCCGCTGTTGTTGGTTGGTTGGTTTGCCGCTCTGAGGAACGGAGCCGCAGCATTCCT

GTAGGGCGCTAACGGCTGTGCTGGCGTCTGTGCGTCGTTGAGCGGTTGTTGTGCCTTGCGTGGACACACTGG

CCGGCAAGTGTTGTGCTTTGCTGCCGGCCTTACGTGCCGTAACTTGCGGTGTGTCTTTGCTTGTGCGCTACG

TCCGTGGCCGTGATGAGACGACGCGGTAGGGCCTGTGCTCGGCTGAAGCACATGGCTTAAGACTCAATGAGT

GCCAGGCACGGCACCGCCAGCGTTTCTTTTTTTTCAATTATTTTTTTTGATGCTTCTTCGGAAGTTGAATGA

AAATTCTAGTCTTATCGGTGGATCACTCGGCTCGTGGATCGATGAAGAACGCAGCCAACTGCGATAATTAGT

GTGAACTGCAGAAACCTTGAACACTGAACTTTCGAATGCACATTGCGCCATTGGAGTTACATCCATTGGTAT

GTCTGGTTCAGGGTCGTTACCCTAAAACGCACTGCATTGCGCGTGTTCAGTTCCAGGGATCACGTGTGTTCG

TCACGCGTGTTCTCTTGGCTTGTTGATCGGAGTCCCACACGTGTGGGTTGGATGTGTCAGCGCGAAATTGTG

TTGTTGTTTTTGCGTTTTACATACCGTAACCTGGGGCGCTTCAATTCACACGTGCTGGTGGCGGGATGCGTT

CGCCACTGAGCATCCGTGCACATTGACTTTTCGACCTGAACTCAGACGTGA

>*H. orientalis*

CCAAGTGATTCACATTCACCACCTATC

TCTTCTGCCCAGTTGATTTGTTGCGGGAGCCACCATACTCCTTTGTCTTCAGACTGAAGGCGGACACGGACC

GGTGTGGCAGGTCTGTGCGCAATGGTTGACATATGAACGGGTGGAGAAGCCCTGTGAGCAACTCTTTTGGGG

TGCTTCGGAAGTTAGAACATGGTATGCTGGGCCCATGTTGAGCGGACTGCTCAACTGGCTTGGTGGCGGACC

AACTGGCTGATGTTGGTTTGCTGTTCTGACGACTGGAGCACGCTTACGGGGCTACCTAACGGCTGCTGCTGG

CGTCTGCGTGTCGTTGAGCGGTTGTTGCGCCTTGCGCAGACACACTGGTCGGTTTGCTGGTTGCTGCTTCCG

ATCTTACATGCCGTAACTCGTGGTGTGTCTGTGCTTGTGTGCTACGTCCGTGGCCGTGATGAGACGACATGG

TAGGGCCTGTGCTGGGCAAAGCACATGGCTTAAGACTTGATGAGTGCCGAGCGGGCACCGCCAGTGTTTCTC

TTTTTTCAATTATTTTTTTTAATGCTTCTTCGGAAGAAAGAGAATTCTAGTCTTATCGGTGGATCACTCGGC

TCGTGGATCGATGAAGAACGCAGCTAACTGCGATAATTAGTGTGAACTGCAGAAACCTTGAACACTGAACTT

TCGAATGCACATTGCGCCATTGGAGTTACATCCATTGGCATGTCTGGTTCAGGGTCGTTACTATAAAACGCA

CTGCTTTGCGTGTTTTTGCCTGAGATCACGTTGCCAGCAGCGTGTTCTCTTGGAGCCTTGTCCCGGCACTGT

GGGTTGGCCATGTCAGCGTGGAATTGTGATGTGCTTCCGCGTTTTACACGCCGTAACTTGGGCATGGTCGGT

CTGCATGTGCTGTGGCAGAATGCTTTGCTGATGGAGCATTCGAGCATTGATTT

>*H. urticae*

CCAAGTGATTCCAATTCACCACCTATCTGTGCTGTTCATGTTGGCTTGTGCGGGCACCACCATATGCCTTCG

CTTGCAGTAGCGGACTTAGACCGTACGAATTTGGTCTGACGCACTGGCTGACGTTAATGGATGGCCGCCCTG

TGGGCAACTCTCGTTGGGGTGTTTACGCCTCTACGGTTGGAGCTGGTATACCAGTCACAGCTTACACGCATA

AAAGCCTGAGGTTGGCTGCGTCTAGCTTGTGTGCTGGTGGTGAGTGGTCCGCTTGCGGTCCTCCTCGCTGCA

CCAACCTAGTGTGCGGACACGCCCGCAGGGCACCCTAACGGCTGTGCTGGCGTCTGAGCGTTGTTGAGTGGT

TGTTGTGCCAAGCGTGTGCATGCTGGCTTTGGAAGTGGTTCTTCCATAGTCTTACGTACCGTAACTAGCGGT

GTGTGTGCGCTTGTGTGCTACGTCCGTGGCCACGATGAGACACCGTGTTAGGGCCCGTGCTCGCTGCAGGCA

CGTGGCTTAAGACTTAATGAGTGCACGGATTGCACCGCCAGCGTTTATTATCTATTTATTTATTTGCATTCA

TTGAATGAACAAGTATATTCTAGCCTTATCGGTGGATCACTCGGCTCGTGGATCGATGAAGAACGCAGCCAA

CTGCGATAATTAGTGTGAACTGCAGAAACCTTGAACACTGAACTTTCGAATGCACATTGCGCCATTGGAGTT

ATATCCATTGGCACGCCTGGTTCAGGGTCGTAACCATAAAACGCACAGCTTATGCGTGTTTAACTCGTTGGA

TCATGCGGACACGCGTGTTCTTTCGGTGTGTCTTATGTGCTTCGCCGGTGGTTTGGGCGTGCTGGCGTGATC

TGTATGTTTAATCGCGCTTTACGTGCCGTAATTTAGGCGCGCCCATTCCCTTGCGTTGTGCAGAGTGYTTGG

CTGGTAGGCACTCAGTGCTTTAACTT

>*H. goettingiana*

TTTGATTACGTCCCTGCCCTTTGTACACACCGCCCGTCGCTGCCCGGGACTGAGCCATTTCGAGAAACTCGG

GGACGATTAGTGTGTCAGCTTCGGCTGTCGCGCAGATTGAAACCGATTTAATCGCAGTGGCTTGAACCGGGC

AAAAGTCGTAACAAGGTAGCTGTAGGTGAACCTGCTGCTGGATCATTACCCAAGTGATTCCAATTCACCACC

TATCTGTGCTGTTCATGTTGGCTTGTGCGGGCACCACCATATGCCTTCGCTTGCAGTAGCGGACTTAGACCG

TACAAGTTTGGTCTGACGCACTGGCTGACGCTATATGAATAGCCGCCCTGTGGGCAACTCTCGTTGGGGTGT

TTACGCCTACGGTTGGAGCATGGTATACCAGCCACTGCTTACACGCATGAAAGCCTGAGGTTTGGCTGCGTC

TAGCTTGTGCGCTGGTGGTGAGTGGGCTGCTCTGCGGTCCTCCTCGCTGCACCGACCTTGGGTACGGACACG

CCCGCAGGGCACACTAACGGCTGTGCTGGCGTCTAAGCGTTGTTGAGTGGTTGTTGTGCCAAGCGTATGCAT

GCTGGCTTTGGAAGTGGTTCTTCCTTAGCCTTACGTACCGTAACTAGCGGTGTGTGTGCGCTTGTGTGCTAC

GTCCGTGGCCACGATGAGACACCGTGTTAGGGCCCGTGCTCGCTGCAGGCACGTGGCTTAAGACTTAATGAG

TGCACGGATTGCACCGCCAGCGTTTATTATTTATTTATTTTTTTACATTCTATGAATGAACAAGTATATTCT

AGCCTTATCGGTGGATCACTCGGCTCGTGGATCGATGAAGAACGCAGCCAACTGCGATAATTAGTGTGAACT

GCAGAAACCTTGAACACTGAACTTTCGAATGCACATTGCGCCATTGGAGTTATATCCATTGGCACGCCTGGT

TCAGGGTCGTAACCATAAAACGCACAGCTTATGCGTGTTATACTCGTAGGATCATGCGGACACGCGTGTTCT

TTCGTTGTGAACTTATGTGCTTCGTAGGTGGTTTGAGTGTGCTGGCGTGATCTGTATGTTTTAATCACGTCT

TACGTACCGTAATTCGGGCGCACCCATTACTCTTGCGTTGTGCAGAGTGCTTGGCTGGTAGGCACTCAGTGC

TTTAACTTTCCGACCTGAACTCAGACGTGAACACCCGCTGAACTTAAGCATATCAGTAAGCGGAAGAAAAAA

ACTAACAGGATTCCTT

>*H. cruciferae*

CCAAGTGATTCCATAGGTGAACCTGCTGCTGGATCATTACCCAAATTCCATTCACCACCCTATCTGTGCTGT

TCATGTTGGCTTGTGCGGGCACCACCATATGCCTTCGCTTGCAGTAGCGGACTTAGACCGTACGAATTTGGT

CTGACGCACTGGCTGACGTTAATGGATGGCCGCCCTGTGGGCAACTCTCGTTGGGGTGTTTACGCCTCTACG

GTTGGAGCTGGTATACCAGTCACAGCTTACACGCATAAAAGCCTGAGGTTGGCTGCGTCTAGCTTGTGTGCT

GGTGGTGAGTGGTCCGCTTGCGGTCCTCCTCGCTGCACCAACCTAGTGTGCGGACACGCCCGCAGGGCACAC

TAACGGCTGTGCTGGCGTCTGAGCGTTGTTGAGTGGTTGTTGTGCCAAGCGTGTGCATGCTGACTTTGGAAG

TGGTTCTTCCATAGTCTTACGTACCGTAACTAGCGGTGTGTGTGCGCTTGTGTGCTACGTCCGTGGCCACGA

TGAGACACCGTGTTAGGGCCCGTGCTCGCTGCAGGCACGTGGCTTAAGACTTAATGAGTGCACGGATTGCAC

CGCCAGCGTTTATTATCTATTTATTTTTTTACATTCATTGAATGAACAAGTATATTCTAGCCTTATCGGTGG

ATCACTCGGCTCGTGGATCGATGAAGAACGCAGCCAACTGGCGATAATTAGTGTGAACTGCAGAAACCTTGA

ACACTGAACTTTCGAATGCACATTGCGCCATTGGAGTTATATCCATTGGCACGCCTGGTTCAGGGTCGTAAC

CATAAAAACGCACAGCTTATGCGTGTTTAACCTCGTTGGATCATGCGGAACACGCGTGTTTCTTTCGGTGTG

ACTTATGTGCTTCGCCGGTGGTTTGGGTGTGCTGGCGTGATCTGTATGTTTAATCGCGCTTTACGTGCCGTA

ATTTAGGCGCACCCATTCCCTTGCGTTGTGCAGAGTGCTTGGCTGGTAGGCACTCAGTGCTTTAACTTTTGA

CCTGAACTCAGACGTGA

>*H. carotae*

GTTTCCGTAGGTGAACCTGCTGCTGGATCATTACCCAAGT

GATTCCAATTCACCACCTATCTGTGCTGTTCATGTTGGCTTGTGCGGGCACCACCATATGCCTTCGCTTGCA

GTAGCGGACTTAGACCGTACGAATTTGGTCTGACGCACTGGCTGACGTTAATGGATGGCCGCCCTGTGGGCA

ACTCTCGTTGGGGTGTTTACGCCTCTACGGTTGGAGCTGGTATACCAGTCACAGCTTACACGCATAAAAGCC

TGAGGTTGGCTGCGTCTAGCTTGTGTGCTGGTGGTGAGTGGTCCGCTTGCGGTCCTCCTCGCTGCACCAACC

TAGTGTGCGGACACGCCCGCAGGGCACACTAACGGCTGTGCTGGCGTCTGAGCGTTGTTGAGTGGTTGTTGT

GCCAAGCGTGTGCATGCTGACTTTGGAAGTGGTTCTTCCATAGTCTTACGTACCGTAACTAGCGGTGTGTGT

GCGCTTGTGTGCTACGTCCGTGGCCACGATGAGACACCGTGTTAGGGCCCGTGCTCGCTGCAGGCACGTGGC

TTAAGACTTAATGAGTGCACGGATTGCACCGCCAGCGTTTATTATCTATTTATTTTTTTACATTCATTGAAT

GAACAAGTATATTCTAGCCTTATCGGTGGATCACTCGGCTCGTGGATCGATGAAGAACGCAGCCAACTGCGA

TAATTAGTGTGAACTGCAGAAACCTTGAACACTGAACTTTCGAATGCACATTGCGCCATTGGAGTTATATCC

ATTGGCACGCCTGGTTCAGGGTCGTAACCATAAAACGCACAGCTTATGCGTGTTTAACTCGTTGGATCATGC

GGACACGCGTGTTCTTTCGGTGTGACTTATGTGCTTCGCGGGTGGTTTGGGTGTGCTGGCGTGATCTGTATG

TTTAATCGCGCTTTACGTGCCGTAATTTAGGCGCACCCATTCCCTTGCGTTGTGCAGAGTGCTTGGCTGGTA

GGCACTCAGTGCTTTAACTTTTCGACCTGAACTCAGACGTGAACACCCGCTGAACTTAAGCATATCAGTAA

>*H. circeae*

CCAAGTGATTCCAATTACCACCTACCTGCTGTTCATAGTTGGCTTGTGCGGGCACATCCATATGCCTTCGCT

TACAGGAGCGGACTAAGACCGTACGAGTTTGGTCTGGCGCACTGGCTGACGCTAATGGATAGCGGCCCTGTG

GGCAACTCTTTGGGGTGTTTACGCCCACGGTTGAAGCTGGTATACCATCCACAGCTTACACGCATAAAAGCC

TGAGGTTGGCTGCGTCTAGTTGTGTGTTGGTGGTGAGTGGACTGCTCTGCGGTCCTGCTCGCTGCACCAACT

TGTGTGCGGACACGCCCGCAGGGCACACTAACGGCTGTGCTGGCGTCTGAGCGTTGTTGAGTGGTTGTTGTG

CCAAGCGTATGCATGCTGACTTGGAAAGAGGTTCTTCCATAGTCTTACGTACCGTAACTAGCGGTGTGTGTG

CGCTTGTGTGCTACGTCCGTGGCCACGATGAGACAATGTGTTAGGGCCCGTGCTCGCTGCTGGCACGTGGCT

TAAGACTTAATGAGTGCCCGGATGGCACCGCCAGCTTTATCATTTATTTATTTATTTACATTCATTGAATGA

ACAAGTATATTCTAGCCTTATCGGTGGATCACTCGGCTCGTGGATCGATGAAGAACGCAGCCAACTGCGATA

ATTAGTGTGAACTGCAGAAACCTTGAACACTGAACTTTCGAATGCACATTGCGCCATTGGAGTTATATCCAT

TGGCACGCCTGGTTCAGGGTCGTAACCATACAATGCACAGCTTGTGCGTGTTTTACTCGTAGGATCATGCGG

TCACGTGTGTTCTTGCGTTGTGAATCTATGTGCTTCGCCGGTGGTTTGGGTGTGCTGACGTGATCTGTCGGT

TTAATCACGTTTTACATGCCGTAATTTAGGCGCACCCATCCTCTTGCGTTGTGCAGAGTGCTTCGCTGGTAG

GCGCTCAGTGCTTTAACT

>*H. scutellariae*

CCAAGTGATTCCAATTACCACCTACCTGCTGTTCATAGTTGGCTTGTGCGGGCACATCCATATGCCTTCGCT

TACAGGAGCGGACTAAGACCGTACGAGTTTGGTCTGGCGCACTGGCTGACGCTAATGGATAGCGGCCCTGTG

GGCAACTCTTTGGGGTGTTTATGCCCACGGTTGGAGCTGGTATACCAGCCACAGCTTACACGCATAAAAGCC

TGAGGTTGGCTGCGTCTAGTTGTGTGTTGGTGGTGAGTGGACTGCTCTGCGGTCCTGCTCGCTGCACCAACT

TGTGTGCGGACACGCCCGCAGGGCACACTAACGGCTGTGCTGGCGTCTGAGCGTTGTTGAGTGGTTGTTGTG

CCAAGCGTATGCATGCTGACTTGGAAAGAGGTTCTTCCATAGTCTTACGTACCGTAACTAGCGGTGTGTGTG

CGCTTGTGTGCTACGTCCGTGGCCACGATGAGACAATGTGTTAGGGCCCGTGCTCGCTGCTGGCACGTGGCT

TAAGACTTAATGAGTGCCCGGATGGCACCGCCAGCTTTATCATTTATTTATTTATTTACATTCATTGAATGA

ACAAGTATATTCTAGCCTTATCGGTGGATCACTCGGCTCGTGGATCGATGAAGAACGCAGCCAACTGCGATA

ATTAGTGTGAACTGCAGAAACCTTGAACACTGAACTTTCGAATGCACATTGCGCCATTGGAGTTATATCCAT

TGGCACGCCTGGTTCAGGGTCGTAACCATACAATGCACAGCTTGTGCGTGTTTTACTCGTAGGATCATGCGG

TCACGTGTGTTCTTGCGTTGTGAATCTATGTGCTTCGCCGGTGGTTTGGGTGTGCTGACGTGATCTGTCGGT

TTAATCACGTTTTACATGCCGTAATTTAGGCGCACCCATCCTCTTGCGTTGTGCAGAGTGCTTCGCTGGTAG

GCGCTCAGTGCTTTAACT

>*Globodera artemisiae*

TTTGATTACGTCCCTGCCCTTTG

TACACACCGCCCGTCGCTGCCCGGGACTGAGCCATTTCGAGAAACTCGGGGACGATTATGCGTGTCGGCTTC

GGTCGTCGCGTTGATTGAAACCGATTTAATCGCAGTGGCTTGAACCGGGCAAAAGTCGTAACAAGGTAGCTG

TAGGTGAACCTGCTGCTGGATCATTACCCAAGTGAACCAAATTCACCAGTTACCTGCTGTCCAGTTGGTCAA

TGTGGGCAAAACCATATGCCTTCGTTTGTTGTTGACGGACACATGCCCGTTGGGTTTGGGCTGGCACATTGA

CTAACAAGTTGAACGGACAGCGCCCTGTGGGCACAAGAGTTTTGGGGTGTTACCGATGTTGGTGGCCCAATG

GGTGAGCCGACGATTGCTGTCGTCGGCGGCTCACTGCGCCAACAGAGGTAGTACGCCCGCAGGGCACCCTAA

CGGCTGTGCTGGCGTCTGTGCGTCGTTGAGCGGTTGTTGCGCCTTGCGCTGATATGCTGACATGGAGTGTGT

AGGCTTCTATTCCATGTCGTACGTACCGTACCTGGCGGCATGTCGGCGTTTGTGTGCTACGTCCGTGGCCGT

GATGAGACGACGTGTTAGGACCCATGCCTGGCATTGGCGTGTGGTTTAAGACTTGATGAGTGCCCGGAGGCA

CCGCCAGCGTTTTTCTCATTTTTATTTATTTTTTCAATGCAATTTGATTGCACGAAATATTCTAGCCTTATC

GGTGGATCACTCGGCTCGTGGATCGATGAAGAACGCAGCCAACTGCGATAATTAGTGTGAACTGCAGAAACC

TTGAACACAGAACTTTCGAATGCACATTGCGCCATTGGAGTAACATCCATTGGCACGCCTGGTTCAGGGTCG

TAACCAAAAAATGCACTGCATGTGCGTGTTTTATTTGCTAAGATCACGACGCTTCGTCGTGTTCTTGCATAA

AAGTGGAATGCTACGCTGTGTGGCGGTTGGGTGTGCTGGCGCGAAAATATGCTTTCTTTCGCGCTTTACAGA

CCGTAATTTAGGCACGCCCTTCGGTCACATGCGATAGCTGAATGCCTGGCAAATAGGCATTTGCAATTGAAC

ATTTCGACCTGAACTCAGACGTGAACACCCGCTGAACTTAAGCATATCAGTAAGCGGAGGAAAAGAAACTAA

CGAGGATTCCCTTAGTAACGGCGAGTGAAAT

>*G. millefolii*

CCAAGTGAACCAATTCACCAGTTACCTGCTGTCCAGTTGGTCAATGTGGGCAAAACCATATGCCTTCGTT

TGTTGTTGACGGACACATGCCCGTTGGGTTTGGGCTGGCACATTGACTAACAAGTTGAATGGACAGCGCC

CTGTGGGCACAAGAGTTTTGGGGTGTTACCGATGTTGGTGGCCCAATGGGTGAGCCGACGATTGCTGTCA

TCGGCGGCTCACCGCGCCAACAGAGGTAGTACGCCCGCAGGGCACCCTAACGGCTGTGCTGGCGTCTGTG

CGTCGTTGAGCGGTTGTTGCGCCTTGCGCTGATATGCTGACATGGAGTGTGTAGGCTTCTATTCCATGTC

GTACGTACCGTACCTGGCGGCATGTCGGCGTTTGTGTGCTACGTCCGTGGCCGTGATGAGACGACGTGTT

AGGACCCATGCCTGGCATTGGCGTGTGGTTTAAGACTTGATGAGTGCCCGGAGGCACCGCCAGCGTTTTT

CTCATTTTTATTTATTTTTTCAATGCAATTTGATTGCACGAAATATTCTAGCCTTATCGGTGGATCACTC

GGCTCGTGGATCGATGAAGAACGCAGCCAACTGCGATAATTAGTGTGAACTGCAGAAACCTTGAACACAG

AACTTTCGAATGCACATTGCGCCATTGGAGTAACATCCATTGGCACGCCTGGTTCAGGGTCGTAACCAAA

AAATGCACTGCATGTGCGTGTTTTATTTGCTAAGATCACGACGCTTCGTCGTGTTCTTGCATAAAATTTG

AATGCTACGCTGTGTGGCGGTTGGGTGTGCTGGCGCGAAAATATGCTTTCTTTCGCGCTTTACAGACCGT

AATTTAGGCACGCCCTTCGGTTCACATGCGATAGTTGAATGCCTGGCAAATAGGCA

>*G. mexicana*

TTTCGAGAAACTCGGGGACGATTATGCGTGTCGGCTTCGGTCGTCGCGTTGATTGGAACCGATTTAATCGCA

GTGGCTTGAACCGGGCAAAAGTCGTAACAAGGTAGCTGTAGGTGAACCTGCTGCTGGATCATTACCCAAGTG

ATACCAATTCACCATCTACCTGCTGTCCAGTTGAGTCAGTGTGGGCAACACCACATGCCTCCGTTTGTTGTT

GACGGACACATGCCCACTATGTTTGGGCTGGCACATTGATCAACAATGTATGGACAGCGCCCTGTGGGCACA

TGAGTGTTGGGGTGTAACCGATGTTGGTGGCCCAATGGGTGACTCGACGATTGTTGCTGTCGTCGGGTCGCT

GCACCAATGGAGGTGGCACGCCCACAGGGCATCCTAACGGCTGTGCTGGCGTCTGTGCGTCGTTGAGCGGTT

GTTGCGCCTTGCGCGGATATGCTGACATGGAGTGTAGGCTGCTATTCCATGTCGTACGTGCCTGTACCCAGC

GGCATGTCTGCGCTTGTGTGCTACGTCCGTGGCCGTGATGAGACGACGTGTTAGGACCCTGTGCCTGGCATT

GGCTACGTGGTTTAAGACTTGATGAGTGCCCGCAGGCACCGCCAGCTTTTTCTCATTTTTATAAATTTTTTA

ATGCAATTTTGATTGCTAAAAATATTCCTAGTCTTATCGGTGGATCACTCGGCTCGTGGATCGATGAAGAAC

GCAGCCAACTGCGATAATTAGTGTGAACTGCAGAAACCTTGAACACAGAACTTTCGAATGCACATTGCGCCA

TTGGAGTGACATCCATTGGCACGCCTGGTTCAGGGTCGTAACCAAAAAATGCACTGCATGTGCGTGTTTTAT

TTGCTAAGATCACGCTTCGGCGTGTTCTTGCATACCATTGAATGCTACGCTGTGTAGCGTTGGACGTGCTGG

CGCGAAAATGTGTTGTCTTTCGCGCTTTACAGACCGTAATTTAGGCACTGCCCTTCGTTCACATGCGATAGC

TGAATGCCTCTGCCAATAGGCATTTGCAATTGAACATTTCGACCTGAACTCAGACGTGAACATCGACTGAAC

TTAAGCATATC

>*G. tabacum*

ACCGCACCAAGAACACACCAAGTGATACCAATTCACCATCTACCTGCTGTCCAGTTGAGTCAG

TGTGGGCAACACCACATGCCTCCGTTTGTTGTTGACGGACACATGCCCGCTGTGTATGGGCTGGCACATTGA

CCAACAGTGTACGGACAGCGCCCTGTGGGCACATGAGTGTTGGGGTGTAACCGATGTTGGTGGCCCTATGGG

TGAGCCGACGATTGCTGCTATCGTCGGGTCGCTGCACCAACGGAGGAAGCACGCCCACAGGGCACCCTAACG

GCTGTGCTGGCGTCTGTGCGTCGTTGAGCGGTTGTTGCGCCTTGCGCGGATATGCTAACATGGAGTGTATGC

TGCTATTCCATGTTGTACGTGCCGTACCCCGCGGCATATCTGCGCTTGTGTGCTACGTCCGTGGCCGTGATG

AGACGACGTGTTAGGACCCGTGCCTGGCATTGGCACGTGGTTTAAGACTTGATGAGTGCCCGCAGGCACCGC

CAGCTTTTTCTCATTTTTATTTATTTTTTTATGCAATTCGATTGCTAAAATATTCTAGTCTTATCGGTGGAT

CACTCGGCTCGTGGATCGATGAAGAACGCAGCCAACTGCGATAATTAGTGTGAACTGCAGAAACCTTGAACA

CAGAACTTTCGAATGCACATTGCGCCATTGGAGTGACATCCATTGGCACGCCTGGTTCAGGGTCGTAACCAA

AAAATGCACTGCATATGCATGTTTTATTTGCTAAGATCACGCTTCGGTGTGTTCTTGCATTACCATTGAATG

CTACGCTGTGTAGCGTTGGACGTGCTGGCGCGAAAATGTGTTGTCATTCGCGCTTTACAGACCGTAATTTAG

GCACGCCCTTCGTTCACGTGCGATAGCTGAATGCCTCGCCAATAGGCATTTGCAATTGAACATTTCGACCTG

AACTCAGACGTGAACAC

>*G. capensis*

TTTGATTACGTCCCTGCCCTTTGTACACACCGCCCGTCGCTGCCCGGGACTGAGCCATTTCGAGAAACTCGG

GGACGATTATGCGTGTCGGCTTCGGTCGTCGCGTTGATTGAAACCGATTTAATCGCAGTGGCTTGAACCGGG

CAAAAGTCGTAACAAGGTAGCTGTAGGTGAACCTGCTGCTGGATCATTACCCAAGTGAACCAATTCACCAGT

TACCTGCTGTCCAGTTTGGTCAGTGTGGGCAATACCACATGCCTTCGTTTGTTGTTTGACGGACCATATGCC

CGTTGGGTTTTTTGGGCTGGCACATTGATCAACAGTTGTGTACGGACAGCGCCCTGTGGGCACAAGAGTTTT

GGGGTGTTATCAATGTTGGTGGTCCGATGGGTGAGCCGACGATTGTTGTCATCGTCGGGTCGCTGTGCCAAC

GGAGGTAGTACGCCCACAGGGCACCCTAACGGCTGTGCTGGCGTCTGTGCGTCGTTGAGCGGTTGTTGCGCC

TTGCGCTGACATGCTGACATGGAGTGTAGGCTGTGCTACTCCATGTTGTACATACCGTACCTAGCGGCATGT

CGGCGCTTGTGTGCTACGTCCGTGGCCGTGATGAGACGACGTGTTAGGACCCGTGCCTGGCATTGGCATGCG

GTTTAAGACTTGATGAGTGCCCGCAGGCACCGCCAGCGTTTTTCTCATTTTTATTATTTTTTTCCATGCAAT

TCGATTGCAAAAAATATTCTAGCCTTATCGGTGGATCACTCGGCTCGTGGATCGATGAAGAACGCAGCTAAC

TGCGATAATTAGTGTGAACTGCAGAAACCTTGAACACAGAACTTTCGAATGCACATTGCGCCATTGGTGTGA

CATCCATTGGCACGCCTGGTTCAGGGTCGTAACCAAAAAATGCACTGCATGTGCATGTTTCATTTGCTAGGA

TCACGCTTAGTCGTGTTCTTGCATAACATTGGAATGCTACGCTGTGTAGCGTTTGGGTGTGCTGGCGTGAAA

ACATGCTTTCTTTCGCGCTTTACAGACCGTAATTTAGGCACGCCCTTCGTTCACATGTGTTAGCTGAATGCC

TCGCCAATAGGCATTTGCACAATTGAACATTTCGACCTGAACTCAGACGTGAACACCCGCTGAACTTAAGCA

TATCAGTAAGCGGAGGAAAAGAAACTAACGAGGATTCCCTTAGTAACCGAAGTGAAAA

>*G. zelandica*

CCAAGTGAACCAATTCACCAGTTACTACCTGCTGTCCAGTTGGTCAATGTGGGCAATACCACATGCCTCCGT

TTGTTGTTGACGGACACATGCCCGCTGGGATTTGGGCTGGCACATTGACTAGCGCGAATTGTACGCGGACAG

CGCCCTGTGGGCACAAGAGTTTTGGGGTGCTACCAATGTTGGTGGCCCGATGGGTGAGCCGACGATTGCTGC

TGTCGTGCGGTTCACTGCGCCAACAGAAGTAGTACGTGTCCACAGGGCACCCTAACGGCTGTGCTGGCGTCT

GTGCGTCGTTGAGCGGTTGTTGTGCCTTGCGCTGATATGCTGACATGGAGTGTGTATGCTGTGTTATTCCAT

GTTGTACGTACCGTACCCTGCGGCATGTCGGCGCTTGTGTGCTACGTCCGTGGCCGTGATGAGACGACGCGT

TAGGACTCATACCTAGCCATTGGCATGTGGTTTAAGACTTGATGAGTGCCCGCAGGCACCGCCAGCGTTTTT

CTCATTTTTATTTATTTTTTGAATGCAATTTGATTGCACGAAATATATTCTAGCCTTATCGGTGGATCACTC

GGCTCGTGGATCGATGAAGAACGCAGCCAACTGCGATAATTAGTGTGAACTGCAGAAACCTTGAACACAGAA

CTTTCGAATGCACATTGCGCCATTGGAGTGACATCCATTGGCACGCCTGGTTCAGGGTCGTAACCAAAAAAT

GCACTGCATGTGCGTGTTTCATGTGCTAAGATCACGCTCCGTCGTGTTCTTGCATAAAATTGGAATATGCTA

CGCTGTGTGTGTAGCGGTCGGGTGTGCTGGCGCGAAAATATGCTTTCTTTCGCGCTTTACAGACCGTAATTT

AGGCGCGCCCTTCCGTTCACATGCGATAGCTGAGAATGCCTGGCGAATAGGCA

>*G. rostochiensis*

TTGATTACGTCCCT

GCCCTTTGTACACACCGCCCGTCGCTGCCCGGGACTGAGCCATTTCGAGAAACTCGGGGACGATTATGCGTG

TCGGCTTCGGTCGTCGCGTTGATTGGAACCGATTTAATCGCAGTGGCTTGAACCGGGCAAAAGTCGTAACAA

GGTAGCTGTAGGTGAACCTGCTGCTGCTGGATCATTACCCAAGTGATACCAATTCACCACCTACCTGCTGTC

CAGTTGAGTCAGTGTGGGCAACACCACATGCCTCCGTTTGTTGTTGACGGACACATGCCCGCTGTGTATGGG

CTGGCACATTGACCAACAATGTACGGACAGCGCCCTGTGGGCACATGAGTGTTGGGGTGTAACCGATGTTGG

TGGCCCTATGGGTGAGCCGACGATTGCTGCTGTCGTCGGGTCGCTGCGCCAACGGAGGAAGCACGCCCACAG

GGCACCCTAACGGCTGTGCTGGCGTCTGTGCGTCGTTGAGCGGTTGTTGCGCCTTGCGCAGATATGCTAACA

TGGAGTGTAGCTGCTACTCCATGTTGTACGTGCCGTACCTTGCGGCATGTCTGCGCTTGTGTGCTACGTCCG

TGGCCGTGATGAGACGACGTGTTAGGACCCGTGCCTTGGCATTGGCACGTGGTTTAAGACTTGATGAGTGCC

CGCAGGCACCGCCAGCTTTTTCCCATTTTTATTTATTTTTTATGCAATTCGATTGCTAAAATATTCTAGTCT

TATCGGTGGATCACTCGGCTCGTGGATCGATGAAGAACGCAGCCAACTGCGATAATTAGTGTGAACTGCAGA

AACCTTGAACACAGAACTTTCGAATGCACATTGCGCCATTGGAGTGACATCCATTGGCACGCCTGGTTCAGG

GTCGTAACCAAAAAATGCACTGCATGTGCGTGTTTTATTTGCTAAGATCACGCTTCGGCGTGTTCTTGCATA

CTATTGAATGCTACGCTGTGTAGCGTTGGACGTGCTGGCGCGAAAATGTGTTGTCATTCGCGCTTTACAGAC

CGTAATTTAGGCACGCCCCTTCGTTCACATGCGATAGCTGAATGCCTCGCCAATAGGCATTTGCAATTGAAC

ATTTCGACCTGAACTCAGACGTGAACACCCGCTGAACTTAAGCATATCAGTAAGCGGAGGAAAAGAAACTAA

CGAGGATTCCCTTAGTAACGGCGAGTGAAA

>*G. pallida*

TTGATTACGTCCCTGCCCTTTGT

ACACACCGCCCGTCGCTGCCCGGGACTGAGCCATTTCGAGAAACTCGGGGACGATTATGCGTGTCGGCTTCG

GTCGTCGCGTTGATTGGAACCGATTTAATCGCAGTGGCTTGAACCGGGCAAAAGTCGTAACAAGGTAGCTGT

AGGTGAACCTGCTGCTGGATCATTACCCAAGTGATACCAATTCACCACCTACCTGCTGTCCAGTTGAGTCAG

TGTGGGCAACACCACATGCCTCCGTTTGTTGTTGACGGACACATGCCCGCTATGTTTGGGCTGGCACATTGA

CCAACAATGTACGGACAGCGCCCTGTGGGCACATGAGTGTTGGGGTGTAACCGCATGTTGGTGGCCCAATGG

GTGACTCGACGATTGCTGTTGTCGTCGGGTCGCTGCACCAACGGAGGTGGCACGCCCACAGGGCACCCTAAC

GGCTGTGCTGGCGTCTGTGCGTCGTTGAGCGGTTGTTGCGCCTTGCGCGGATATGCTGACATGGAGTGTAGG

CTGCTATTCCATGTTGTACGTGCCGTACCCGGCGGCATGTCTGCGCTTGTGTGCTACGTCCGTGGCCGTGAT

GAGACGACGTGTTAGGACCCGTGCCTGGCATTGGCACGTGGTTTAAGACTTGATGAGTGCCCGCAGGCACCG

CCAGCTTTTTCTCATTTTTATAAATTTTTTAATGCAATTTGATTGCTAAAATATTCTAGTCTTATCGGTGGA

TCACTCGGCTCGTGGATCGATGAAGAACGCAGCCAACTGCGATAATTAGTGTGAACTGCAGAAACCTTGAAC

ACAGAACTTTCGAATGCACATTGCGCCATTGGAGTGACATCCATTGGCACGCCTGGTTCAGGGTCGTAACCA

AAAAATGCACTGCATGTGCGTGTTTTATTTGCTAAGATCACGCTTCGGCGTGTTCTTGCATACCATTGAATG

CTACGCTGTGTAGCGTTGGACGTGCTGGCGCGAAAATGTGTTGTCTTTCGCGCTTTACAGACCGTAATTTAG

GCACGCCCTTCGTTCACATGCGATAGCTGAATGCCTCGCCAATAGGCATTCGCAATTGAACATTTCGACCTG

AACTCAGACGTGAACACCCGCTGAACTTAAGCATATCAGTAAGCGGAGGAAAAGAAACTAACGAGGATTCCC

GTAGTAACGGCGAGTGAAAT
